# Supplementary material for: Genome-Wide Identification, Evolutionary and Mutational Analysis of the Buffalo Sox Gene Family
Source: MDPI journal article supplement (doi:10.3390/ani13142246), 2023-07-08
Supplement: s1 [file s1]

## Supplementary Material

|               |                                                                                          |     |
|---------------|------------------------------------------------------------------------------------------|-----|
| Cow_SOX-1     | MYSMMMETDLHSPGGAQAPTNLSPGAGGGGGGGGGG---SKANQDRVKRPMNAFMVWSRGQRRKMAQENPKMHNSEISKRLGAEWKVM | 87  |
| Buffalo_SOX-1 | MYSMMMETDLHSPGGAQAPTNLSPGAGGGGGGGGGG---SKANQDRVKRPMNAFMVWSRGQRRKMAQENPKMHNSEISKRLGAEWKVM | 88  |
| Goat_SOX-1    | MYSMMMETDLHSPGGAQAPTNLSPGAGGGGGGGGGGGSKANQDRVKRPMNAFMVWSRGQRRKMAQENPKMHNSEISKRLGAEWKVM   | 90  |
| Sheep_SOX-1   | MYSMMMETDLHSPGGAQAPTNLSPGAGGGGGGGGGGGSKANQDRVKRPMNAFMVWSRGQRRKMAQENPKMHNSEISKRLGAEWKVM   | 89  |
| Cow_SOX-1     | SEAEKRPFIDEAKRLRALHMKHEPDYKYRPRRKTTLTKKDKYSLAGLLAAGAGGGAAVAVGVGAAAVGQRLSPGGAAGGGYAHVNGW  | 177 |
| Buffalo_SOX-1 | SEAEKRPFIDEAKRLRALHMKHEPDYKYRPRRKTTLTKKDKYSLAGLLAAGAGGGAAVAVGVGAAAVGQRLSPGGAAGGGYAHVNGW  | 178 |
| Goat_SOX-1    | SEAEKRPFIDEAKRLRALHMKHEPDYKYRPRRKTTLTKKDKYSLAGLLAAGAGGGAAVAVGVGAAAVGQRLSPGGAAGGGYAHVNGW  | 180 |
| Sheep_SOX-1   | SEAEKRPFIDEAKRLRALHMKHEPDYKYRPRRKTTLTKKDKYSLAGLLAAGAGGGAAVAVGVGAAAVGQRLSPGGAAGGGYAHVNGW  | 179 |
| Cow_SOX-1     | ANGAYPGSVAAAAAAMMQEAQLAYGQHPGAGGAHPHAHPHAPHHHPHAPHNPQPMHRYDMGALQYSPISNSQGYMSASPSGYGGLP   | 267 |
| Buffalo_SOX-1 | ANGAYPGSVAAAAAAMMQEAQLAYGQHPGAGGAHPHAHPHAPHHHPHAPHNPQPMHRYDMGALQYSPISNSQGYMSASPSGYGGLP   | 268 |
| Goat_SOX-1    | ANGAYPGSVAAAAAAMMQEAQLAYGQHPGAGGAHPHAHPHAPHHHPHAPHNPQPMHRYDMGALQYSPISNSQGYMSASPSGYGGLP   | 270 |
| Sheep_SOX-1   | ANGAYPGSVAAAAAAMMQEAQLAYGQHPGAGGAHPHAHPHAPHHHPHAPHNPQPMHRYDMGALQYSPISNSQGYMSASPSGYGGLP   | 269 |
| Cow_SOX-1     | YGAAGGAHQNSAVAAAAAASSGALGALGSLVKSEPSGSPAAAHSRAPCPGDLREMISMYLPAGEGGDPAAAQSRRLHSLPPHYQGAG  | 357 |
| Buffalo_SOX-1 | YGAAGGAHQNSAVAAAAAASSGALGALGSLVKSEPSGSPAAAHSRAPCPGDLREMISMYLPAGEGGDPAAAQSRRLHSLPPHYQGAG  | 358 |
| Goat_SOX-1    | YGAAGGAHQNSAVAAAAAASSGALGALGSLVKSEPSGSPAAAHSRAPCPGDLREMISMYLPAGEGGDPAAAQSRRLHSLPPHYQGAG  | 360 |
| Sheep_SOX-1   | YGAAGGAHQNSAVAAAAAASSGALGALGSLVKSEPSGSPAAAHSRAPCPGDLREMISMYLPAGEGGDPAAAQSRRLHSLPPHYQGAG  | 359 |
| Cow_SOX-1     | AGANGTVPLTHI                                                                             | 369 |
| Buffalo_SOX-1 | AGANGTVPLTHI                                                                             | 370 |
| Goat_SOX-1    | AGANGTVPLTHI                                                                             | 372 |
| Sheep_SOX-1   | AGANGTVPLTHI                                                                             | 371 |

**Figure S1.** Comparative amino acid analysis of Sox1 gene in Cattle, buffalo, Sheep, and Goat

|               |                                                                                           |     |
|---------------|-------------------------------------------------------------------------------------------|-----|
| Cow_SOX-2     | MYNMMETELKPPGQQTSGGGGGGGG-NSTAAAAGGNQKNSPDRVKRPMNAFMVWSRGQRRKMAQENPKMHNSEISKRLGAEWKLLSETE | 89  |
| Buffalo_SOX-2 | MYNMMETELKPPGQQTSGGGGGGGG-NSTAAAAGGNQKNSPDRVKRPMNAFMVWSRGQRRKMAQENPKMHNSEISKRLGAEWKLLSETE | 90  |
| Goat_SOX-2    | MYNMMETELEQPGQHNSGGGGGGGG-NSTAAAAGGNQKNSPDRVKRPMNAFMVWSRGQRRKMAQENPKMHNSEISKRLGAEWKLLSETE | 89  |
| Sheep_SOX-2   | MYNMMETELKPPGQQTSGGGGGGGG-NSTAAAAGGNQKNSPDRVKRPMNAFMVWSRGQRRKMAQENPKMHNSEISKRLGAEWKLLSETE | 89  |
| Cow_SOX-2     | KRPFIDEAKRLRALHMKHEPDYKYRPRRKTTLTKKDKYTLPGGLLAPGGNSMASGCVGVGAGLGAGVNRMDSYAHMNGWSNGSYSMMD  | 179 |
| Buffalo_SOX-2 | KRPFIDEAKRLRALHMKHEPDYKYRPRRKTTLTKKDKYTLPGGLLAPGGNSMASGCVGVGAGLGAGVNRMDSYAHMNGWSNGSYSMMD  | 180 |
| Goat_SOX-2    | KRPFIDEAKRLRALHMKHEPDYKYRPRRKTTLTKKDKYTLPGGLLAPGGNSMASGCVGVGAGLGAGVNRMDSYAHMNGWSNGSYSMMD  | 179 |
| Sheep_SOX-2   | KRPFIDEAKRLRALHMKHEPDYKYRPRRKTTLTKKDKYTLPGGLLAPGGNSMASGCVGVGAGLGAGVNRMDSYAHMNGWSNGSYSMMD  | 179 |
| Cow_SOX-2     | QLGYPQHPGLNAHGAAQMPMHRYDVSALQYNSMTSSQTYMNGSPTYMSYSQQGTPGMALGSMGVSVKSEASSPPVVTSSSHSRAPCQ   | 269 |
| Buffalo_SOX-2 | QLGYPQHPGLNAHGAAQMPMHRYDVSALQYNSMTSSQTYMNGSPTYMSYSQQGTPGMALGSMGVSVKSEASSPPVVTSSSHSRAPCQ   | 270 |
| Goat_SOX-2    | QLGYPQHPGLNAHGAAQMPMHRYDVSALQYNSMTSSQTYMNGSPTYMSYSQQGTPGMALGSMGVSVKSEASSPPVVTSSSHSRAPCQ   | 269 |
| Sheep_SOX-2   | QLGYPQHPGLNAHGAAQMPMHRYDVSALQYNSMTSSQTYMNGSPTYMSYSQQGTPGMALGSMGVSVKSEASSPPVVTSSSHSRAPCQ   | 269 |
| Cow_SOX-2     | AGDLRDMISMYLPGAEVPEPAAPSLHMSQHYQSGFVPGTAINGTLPLSHM                                        | 320 |
| Buffalo_SOX-2 | AGDLRDMISMYLPGAEVPEPAAPSLHMSQHYQSGFVPGTAINGTLPLSHM                                        | 321 |
| Goat_SOX-2    | AGDLRDMISMYLPGAEVPEPAAPSLHMSQHYQSGFVPGTAINGTLPLSHM                                        | 320 |
| Sheep_SOX-2   | AGDLRDMISMYLPGAEVPEPAAPSLHMSQHYQSGFVPGTAINGTLPLSHM                                        | 320 |

**Figure S2.** Comparative amino acid analysis of Sox2 gene in cattle, buffalo, sheep, and goat

|               |                                                                                            |     |
|---------------|--------------------------------------------------------------------------------------------|-----|
| Cow_SOX-3     | -----MRPARDHASGASSIRGPADLARTTAASLPFFPDPRQRPPSAPPT                                          | 45  |
| Buffalo_SOX-3 | MIGQGASLQACQSPGLRVARGGPSNPPEGSEQVYKRPGERPTRLRMRPARDHASGASSIRGPADLARTTAASLPFFPDPRQRPPSAPPT  | 90  |
| Goat_SOX-3    | -----MRPARDHASGASSIRGPADLARTTAASLPFFPDPRQRPPSAPPT                                          | 45  |
| Sheep_SOX-3   | -----MRPARDHASGASSIRGPADLARTTAASLPFFPDPRQRPPSAPPT                                          | 45  |
| Cow_SOX-3     | ESPGLFTVAAPAPGAPSPPATLAHLLPAPAMYSLLETTELKNPVGPPTPAAGAGGPAAPGGACKSSANAGGGANAGGSSGGASAGGGGGG | 135 |
| Buffalo_SOX-3 | ESPGLFTVAAPAPGAPSPPATLAHLLPAPAMYSLLETTELKNPVGPPTPAAGAGGPAAPGGACKSSANAGGGANAGGSSGGASAGGGGGG | 180 |
| Goat_SOX-3    | ESPGLFTVAAPAPGAPSPPATLAHLLPAPAMYSLLETTELKNPVGPPTPAAGAGGPAAPGGACKSSANAGGGANAGGSSGGASAGGGGGG | 135 |
| Sheep_SOX-3   | ESPGLFTVAAPAPGAPSPPATLAHLLPAPAMYSLLETTELKNPVGPPTPAAGAGGPAAPGGACKSSANAGGGANAGGSSGGASAGGGGGG | 135 |
| Cow_SOX-3     | GGGGGGSDQDRVKRPMNAFMVWSRGQRRKMALENPKMHNSEISKRLGADWKLLTDAEKRPFIDEAKRLRAVHMKEYPDYKYRPRRKT    | 224 |
| Buffalo_SOX-3 | GGGGGGSDQDRVKRPMNAFMVWSRGQRRKMALENPKMHNSEISKRLGADWKLLTDAEKRPFIDEAKRLRAVHMKEYPDYKYRPRRKT    | 270 |
| Goat_SOX-3    | GGGGGGSDQDRVKRPMNAFMVWSRGQRRKMALENPKMHNSEISKRLGADWKLLTDAEKRPFIDEAKRLRAVHMKEYPDYKYRPRRKT    | 224 |
| Sheep_SOX-3   | GGGGGGSDQDRVKRPMNAFMVWSRGQRRKMALENPKMHNSEISKRLGADWKLLTDAEKRPFIDEAKRLRAVHMKEYPDYKYRPRRKT    | 224 |
| Cow_SOX-3     | TLLKKDKYSLPGGLLPPGAAAAAAAAAAAAASSPVGVGQRLDTYTHVNGWANGAYSLVQEQQLGYAPPATMSSPPPPALPQMHRVDMAG  | 314 |
| Buffalo_SOX-3 | TLLKKDKYSLPGGLLPPGAAAAAAAAAAAAASSPVGVGQRLDTYTHVNGWANGAYSLVQEQQLGYAPPATMSSPPPPALPQMHRVDMAG  | 360 |
| Goat_SOX-3    | TLLKKDKYSLPGGLLPPGAAAAAAAAAAAAASSPVGVGQRLDTYTHVNGWANGAYSLVQEQQLGYAPPATMSSPPPPALPQMHRVDMAG  | 314 |
| Sheep_SOX-3   | TLLKKDKYSLPGGLLPPGAAAAAAAAAAAAASSPVGVGQRLDTYTHVNGWANGAYSLVQEQQLGYAPPATMSSPPPPALPQMHRVDMAG  | 314 |
| Cow_SOX-3     | LQYSPMMPPGAQSYMNAASGYGSMAPSAAYGQQPAAAAAAAMSLGPMGTVVKTEPSSPPPAIASHSQRACLGDLRD               | 404 |
| Buffalo_SOX-3 | LQYSPMMPPGAQSYMNAASGYGSMAPSAAYGQQPAAAAAAAMSLGPMGTVVKTEPSSPPPAIASHSQRACLGDLRD               | 450 |
| Goat_SOX-3    | LQYSPMMPPGAQSYMNAASGYGSMAPSAAYGQQPAAAAAAAMSLGPMGTVVKTEPSSPPPAIASHSQRACLGDLRD               | 404 |
| Sheep_SOX-3   | LQYSPMMPPGAQSYMNAASGYGSMAPSAAYGQQPAAAAAAAMSLGPMGTVVKTEPSSPPPAIASHSQRACLGDLRD               | 404 |
| Cow_SOX-3     | MISMYLPPGGDAADAASPLPGRRLHSVHQHYQGAGTAVNGTVPLTHI                                            | 451 |
| Buffalo_SOX-3 | MISMYLPPGGDAADAASPLPGRRLHSVHQHYQGAGTAVNGTVPLTHI                                            | 497 |
| Goat_SOX-3    | MISMYLPPGGDAADAASPLPGRRLHSVHQHYQGAGTAVNGTVPLTHI                                            | 451 |
| Sheep_SOX-3   | MISMYLPPGGDAADAASPLPGRRLHSVHQHYQGAGTAVNGTVPLTHI                                            | 451 |

**Figure S3.** Comparative amino acid analysis of Sox3 gene in cattle, buffalo, sheep, and goat

|               |                                                   |                            |                                  |     |
|---------------|---------------------------------------------------|----------------------------|----------------------------------|-----|
| Cow_SOX-4     | MVQQTNNAENTEALLAGESSDSGAGLELGIASSPTPGSTASTGGKADDP | PSGHIKRP                   | NAFMVWSQIERRKIMEQSPDMHNAEIS      | 90  |
| Buffalo_SOX-4 | MVQQTNNAENTEALLAGESSDSGAGLELGIASSPTPGSTASTGGKADDP | PSGHIKRP                   | NAFMVWSQIERRKIMEQSPDMHNAEIS      | 90  |
| Goat_SOX-4    | MVQQTNNAENTEALLAGESSDSGAGLELGIASSPTPGSTASTGGKADDP | PSGHIKRP                   | NAFMVWSQIERRKIMEQSPDMHNAEIS      | 90  |
| Sheep_SOX-4   | MVQQTNNAENTEALLAGESSDSGAGLELGIASSPTPGSTASTGGKADDP | PSGHIKRP                   | NAFMVWSQIERRKIMEQSPDMHNAEIS      | 90  |
| Cow_SOX-4     | KRLGKRWKLKDSKIPFIREAERLRLKHMADYPDYKYRPRKKVKSGNANS | GSAAAAASKPGEKGD            | KVGGSGHGGGGGGSHAGGGGGG           | 180 |
| Buffalo_SOX-4 | KRLGKRWKLKDSKIPFIREAERLRLKHMADYPDYKYRPRKKVKSGNANS | GSAAAAASKPGEKGD            | KVGGSGHGGGGGGSHAGGGGGG           | 180 |
| Goat_SOX-4    | KRLGKRWKLKDSKIPFIREAERLRLKHMADYPDYKYRPRKKVKSGNANS | GSAAAAASKPGEKGD            | KVGGSGHGGGGGGSHAGGGGGG           | 180 |
| Sheep_SOX-4   | KRLGKRWKLKDSKIPFIREAERLRLKHMADYPDYKYRPRKKVKSGNANS | GSAAAAASKPGEKGD            | KVGGSGHGGGGGGSHAGGGGGG           | 180 |
| Cow_SOX-4     | ASGGGANSKPAQKKSCGSKVAGGGVGKPHAKLILAGGGGKAAAAT     | ASASSSSSSSS--FAAEQAGAAALLP | GAAAAAADHHSLYKARTP               | 268 |
| Buffalo_SOX-4 | ASGGGANSKPAQKKSCGSKVAGGGVGKPHAKLILAGGGGKAAAAT     | ASASSSSSSSS--FAAEQAGAAALLP | GAAAAAADHHSLYKARTP               | 268 |
| Goat_SOX-4    | ASGGGANSKPAQKKSCGSKVAGGGVGKPHAKLILAGGGGKAAAAT     | ASASSSSSSSS--FAAEQAGAAALLP | GAAAAAADHHSLYKARTP               | 270 |
| Sheep_SOX-4   | ASGGGANSKPAQKKSCGSKVAGGGVGKPHAKLILAGGGGKAAAAT     | ASASSSSSSSS--FAAEQAGAAALLP | GAAAAAADHHSLYKARTP               | 270 |
| Cow_SOX-4     | --GASASAAAASASAGLAAPGKHDAEKKVKRVYLF               | FGGLGASSSPVGGV             | GAGADPSDPLGLYEEGGAGCSPDGP        | 356 |
| Buffalo_SOX-4 | --GASASAAAASASAGLAAPGKHDAEKKVKRVYLF               | FGGLGASSSPVGGV             | GAGADPSDPLGLYEEGGAGCSPDGP        | 356 |
| Goat_SOX-4    | SASASASAAAASASAGLAAPGKHDAEKKVKRVYLF               | FGGLGASSSPVGGV             | GAGADPSDPLGLYEEGGAGCSPDGP        | 360 |
| Sheep_SOX-4   | SASASASAAAASASAGLAAPGKHDAEKKVKRVYLF               | FGGLGASSSPVGGV             | GAGADPSDPLGLYEEGGAGCSPDGP        | 360 |
| Cow_SOX-4     | ADHRSYASLRAASPAPSSAPSHASSSASSSSSSSSSSSSSSSSSS     | SSSSSDDEFEDDLLD            | LNPNSSNFESMSLGSFSSSSALDRDLDFNFEP | 445 |
| Buffalo_SOX-4 | ADHRSYASLRAASPAPSSAPSHASSSASSSSSSSSSSSSSSSSSS     | SSSSSDDEFEDDLLD            | LNPNSSNFESMSLGSFSSSSALDRDLDFNFEP | 446 |
| Goat_SOX-4    | ADHRSYASLRAASPAPSSAPSHASSSASSSSSSSSSSSSSSSSSS     | SSSSSDDEFEDDLLD            | LNPNSSNFESMSLGSFSSSSALDRDLDFNFEP | 449 |
| Sheep_SOX-4   | ADHRSYASLRAASPAPSSAPSHASSSASSSSSSSSSSSSSSSSSS     | SSSSSDDEFEDDLLD            | LNPNSSNFESMSLGSFSSSSALDRDLDFNFEP | 449 |
| Cow_SOX-4     | GS                                                | SGSHFEFPDYCTPEVSEMI        | SGDWLESSISNLVFTY                 | 481 |
| Buffalo_SOX-4 | GS                                                | SGSHFEFPDYCTPEVSEMI        | SGDWLESSISNLVFTY                 | 482 |
| Goat_SOX-4    | GS                                                | SGSHFEFPDYCTPEVSEMI        | SGDWLESSISNLVFTY                 | 485 |
| Sheep_SOX-4   | GS                                                | SGSHFEFPDYCTPEVSEMI        | SGDWLESSISNLVFTY                 | 485 |

**Figure S4.** Comparative amino acid analysis of Sox4 gene in cattle, buffalo, sheep, and goat

|               |                                                                                              |     |
|---------------|----------------------------------------------------------------------------------------------|-----|
| Cow_SOX-5     | MLTDPDLPQEFERMSSKRPASPYGEADGEVAMVTSRQKVEEESDGLPAFHLPLHVSFPNKPHEEFQPVSLLTQETCGHRTPTASQHNTM    | 90  |
| Buffalo_SOX-5 | MLTDPDLPQEFERMSSKRPASPYGEADGEVAMVTSRQKVEEESDGLPAFHLPLHVSFPNKPHEEFQPVSLLTQETCGHRTPTASQHNTM    | 90  |
| Goat_SOX-5    | MLTDPDLPQEFERMSSKRPASPYGEADGEVAMVTSRQKVEEESDGLPAFHLPLHVSFPNKPHEEFQPVSLLTQETCGHRTPTASQHNTM    | 90  |
| Sheep_SOX-5   | MLTDPDLPQEFERMSSKRPASPYGEADGEVAMVTSRQKVEEESDGLPAFHLPLHVSFPNKPHEEFQPVSLLTQETCGHRTPTASQHNTM    | 90  |
| Cow_SOX-5     | EVDGNKMSSSFAPHNSSTSPQKAEEGGRQSGESLSSTTLGTPERRKGLADVVDTLKQRKMEELIKNEPEETPSIEKLLSKDWKDKLLAM    | 180 |
| Buffalo_SOX-5 | EVDGNKMSSSFAPHNSSTSPQKAEEGGRQSGESLSSTTLGTPERRKGLADVVDTLKQRKMEELIKNEPEETPSIEKLLSKDWKDKLLAM    | 180 |
| Goat_SOX-5    | EVDGNKMSSSFAPHNSSTSPQKAEEGGRQSGESLSSTTLGTPERRKGLADVVDTLKQRKMEELIKNEPEETPSIEKLLSKDWKDKLLAM    | 180 |
| Sheep_SOX-5   | EVDGNKMSSSFAPHNSSTSPQKAEEGGRQSGESLSSTTLGTPERRKGLADVVDTLKQRKMEELIKNEPEETPSIEKLLSKDWKDKLLAM    | 180 |
| Cow_SOX-5     | GSGNFGEIKGTPESLAEKERQLMGINQLTSLREQLLAAHDEQKKLAASQIEKQRQQMELARQQQEQTARQQQQLLQQQHKNLLQQQIQ     | 270 |
| Buffalo_SOX-5 | GSGNFGEIKGTPESLAEKERQLMGINQLTSLREQLLAAHDEQKKLAASQIEKQRQQMELARQQQEQTARQQQQLLQQQHKNLLQQQIQ     | 270 |
| Goat_SOX-5    | GSGNFGEIKGTPESLAEKERQLMGINQLTSLREQLLAAHDEQKKLAASQIEKQRQQMELARQQQEQTARQQQQLLQQQHKNLLQQQIQ     | 270 |
| Sheep_SOX-5   | GSGNFGEIKGTPESLAEKERQLMGINQLTSLREQLLAAHDEQKKLAASQIEKQRQQMELARQQQEQTARQQQQLLQQQHKNLLQQQIQ     | 270 |
| Cow_SOX-5     | QVQGQLPPLMIPVFPPDQRTLAAAQQGFLPPGFSYKAGCSDPYPVQLIPTTMAAAAAATPGLGPLQLQQLYAAQLAAMQVSPGGKLP      | 360 |
| Buffalo_SOX-5 | QVQGQLPPLMIPVFPPDQRTLAAAQQGFLPPGFSYKAGCSDPYPVQLIPTTMAAAAAATPGLGPLQLQQLYAAQLAAMQVSPGGKLP      | 360 |
| Goat_SOX-5    | QVQGQLPPLMIPVFPPDQRTLAAAQQGFLPPGFSYKAGCSDPYPVQLIPTTMAAAAAATPGLGPLQLQQLYAAQLAAMQVSPGGKLP      | 359 |
| Sheep_SOX-5   | QVQGQLPPLMIPVFPPDQRTLAAAQQGFLPPGFSYKAGCSDPYPVQLIPTTMAAAAAATPGLGPLQLQQLYAAQLAAMQVSPGGKLP      | 360 |
| Cow_SOX-5     | VSQGNLGAAVSPTSISHTDKSTNSPPPKSKDEVAQPLNLSAKPKTSDGKSPTSPTSPHMPALRINSAGAGPLKASVPASLASPSARVSTIGY | 450 |
| Buffalo_SOX-5 | VSQGNLGAAVSPTSISHTDKSTNSPPPKSKDEVAQPLNLSAKPKTSDGKSPTSPTSPHMPALRINSAGAGPLKASVPASLASPSARVSTIGY | 450 |
| Goat_SOX-5    | VSQGNLGAAVSPTSISHTDKSTNSPPPKSKDEVAQPLNLSAKPKTSDGKSPTSPTSPHMPALRINSAGAGPLKASVPASLASPSARVSTIGY | 449 |
| Sheep_SOX-5   | VSQGNLGAAVSPTSISHTDKSTNSPPPKSKDEVAQPLNLSAKPKTSDGKSPTSPTSPHMPALRINSAGAGPLKASVPASLASPSARVSTIGY | 450 |
| Cow_SOX-5     | LNDHDAVTKAIQEARQMKEQLRREQQVLDGKVAVVNSLGLNCRTEKEKTTLESITQQLAVKQNEEGKFSHAMMDFNMSGSDSGSAGVSE    | 540 |
| Buffalo_SOX-5 | LNDHDAVTKAIQEARQMKEQLRREQQVLDGKVAVVNSLGLNCRTEKEKTTLESITQQLAVKQNEEGKFSHAMMDFNMSGSDSGSAGVSE    | 540 |
| Goat_SOX-5    | LNDHDAVTKAIQEARQMKEQLRREQQVLDGKVAVVNSLGLNCRTEKEKTTLESITQQLAVKQNEEGKFSHAMMDFNMSGSDSGSAGVSE    | 539 |
| Sheep_SOX-5   | LNDHDAVTKAIQEARQMKEQLRREQQVLDGKVAVVNSLGLNCRTEKEKTTLESITQQLAVKQNEEGKFSHAMMDFNMSGSDSGSAGVSE    | 540 |
| Cow_SOX-5     | SRIYRESRGRGSNEPHIKRPMNAFMVWAKDERRKILQAFPMHNSNISKILGSRWKAMTNLEKQPYEEQARLSKQHLEKYPDYKYKRP      | 630 |
| Buffalo_SOX-5 | SRIYRESRGRGSNEPHIKRPMNAFMVWAKDERRKILQAFPMHNSNISKILGSRWKAMTNLEKQPYEEQARLSKQHLEKYPDYKYKRP      | 630 |
| Goat_SOX-5    | SRIYRESRGRGSNEPHIKRPMNAFMVWAKDERRKILQAFPMHNSNISKILGSRWKAMTNLEKQPYEEQARLSKQHLEKYPDYKYKRP      | 629 |
| Sheep_SOX-5   | SRIYRESRGRGSNEPHIKRPMNAFMVWAKDERRKILQAFPMHNSNISKILGSRWKAMTNLEKQPYEEQARLSKQHLEKYPDYKYKRP      | 630 |
| Cow_SOX-5     | KRTCLVDGKKLRIGEYKAIMRNRQEMRQYFNVGQQAQIPIATAGVVYPGAIAMAGMPSPHLPSEHSSVSSSPGMPVIQSTYGVKGEE      | 720 |
| Buffalo_SOX-5 | KRTCLVDGKKLRIGEYKAIMRNRQEMRQYFNVGQQAQIPIATAGVVYPGAIAMAGMPSPHLPSEHSSVSSSPGMPVIQSTYGVKGEE      | 720 |
| Goat_SOX-5    | KRTCLVDGKKLRIGEYKAIMRNRQEMRQYFNVGQQAQIPIATAGVVYPGAIAMAGMPSPHLPSEHSSVSSSPGMPVIQSTYGVKGEE      | 719 |
| Sheep_SOX-5   | KRTCLVDGKKLRIGEYKAIMRNRQEMRQYFNVGQQAQIPIATAGVVYPGAIAMAGMPSPHLPSEHSSVSSSPGMPVIQSTYGVKGEE      | 720 |
| Cow_SOX-5     | PHIKEEIQAEDINGEIIYDEYDEEEDDPDVDYGSSENHIAGQAN                                                 | 764 |
| Buffalo_SOX-5 | PHIKEEIQAEDINGEIIYDEYDEEEDDPDVDYGSSENHIAGQAN                                                 | 764 |
| Goat_SOX-5    | PHIKEEIQAEDINGEIIYDEYDEEEDDPDVDYGSSENHIAGQAN                                                 | 763 |
| Sheep_SOX-5   | PHIKEEIQAEDINGEIIYDEYDEEEDDPDVDYGSSENHIAGQAN                                                 | 764 |

**Figure S5.** Comparative amino acid analysis of Sox5 gene in cattle, buffalo, sheep, and goat

|               |                                                                                             |     |
|---------------|---------------------------------------------------------------------------------------------|-----|
| Cow_SoX-6     | -MLSSSEVLADVVRESRIEENKKS--SHFIRMSSKQATSPFACTADGEEAMTQDLTSREKEEGSDQHVASHLPLHPIMHNKPHSEELPTLV | 87  |
| Buffalo_SoX-6 | -MPSSSEVLADVVRESRIEENKKS--SHFIRMSSKQATSPFACTADGEDAMTQDLTSREKEEGSDQHVASHLPLHPIMHNKPHSEELPTLV | 87  |
| Goat_SoX-6    | MYLFFSELICICLHVRRQKTWADMYSTDTRMSSKQATSPFACTADGEEAMTQDLTSREKEEGSDQHVASHLPLHPIMHNKPHSEELPTLV  | 90  |
| Sheep_SoX-6   | -MPSSSEVLADVVRESRIEENKKS--SHFIRMSSKQATSPFACTADGEEAMTQDLTSREKEEGSDQHVASHLPLHPIMHNKPHSEELPTLV | 87  |
| Cow_SoX-6     | NTIQDADWDVSLSSQQRMESENNKLCSLYSFRNTSTSPHKPDEGSRDREMTSVTFGTPERRKGLADVVDTLKQKKLEEMTRTEQEDS     | 177 |
| Buffalo_SoX-6 | NTIQDADWDVSLSSQQRMESENNKLCSLYSFRNTSTSPHKPDEGSRDREMTSVTFGTPERRKGLADVVDTLKQKKLEEMTRTEQEDS     | 177 |
| Goat_SoX-6    | NTIQDADWDVSLSSQQRMESENNKLCSLYSFRNTSTSPHKPDEGSRDREMTSVTFGTPERRKGLADVVDTLKQKKLEEMTRTEQEDS     | 180 |
| Sheep_SoX-6   | NTIQDADWDVSLSSQQRMESENNKLCSLYSFRNTSTSPHKPDEGSRDREMTSVTFGTPERRKGLADVVDTLKQKKLEEMTRTEQEDS     | 177 |
| Cow_SoX-6     | SCMEKLLSKDNKEKMERLNTSELLGEIKGTPESLAEKERQLSTMITQLISLREQLLAHDEQKKLAASQIEKQRQQMDLARQQEQIARQ    | 267 |
| Buffalo_SoX-6 | SCMEKLLSKDNKEKMERLNTSELLGEIKGTPESLAEKERQLSTMITQLISLREQLLAHDEQKKLAASQIEKQRQQMDLARQQEQIARQ    | 267 |
| Goat_SoX-6    | SCMEKLLSKDNKEKMERLNTSELLGEIKGTPESLAEKERQLSTMITQLISLREQLLAHDEQKKLAASQIEKQRQQMDLARQQEQIARQ    | 270 |
| Sheep_SoX-6   | SCMEKLLSKDNKEKMERLNTSELLGEIKGTPESLAEKERQLSTMITQLISLREQLLAHDEQKKLAASQIEKQRQQMDLARQQEQIARQ    | 267 |
| Cow_SoX-6     | QQQLLQQQHKNINLLQQQIQ-VQGHMPLMIPFPHDQRTLAAAAAAQQGFLFPPGITYKPGDNYPVQFIPSTMAAAAASGLSPLQLQKGH   | 356 |
| Buffalo_SoX-6 | QQQLLQQQHKNINLLQQQIQ-VQGHMPLMIPFPHDQRTLAAAAAAQQGFLFPPGITYKPGDNYPVQFIPSTMAAAAASGLSPLQLQKGH   | 357 |
| Goat_SoX-6    | QQQLLQQQHKNINLLQQQIQ-VQGHMPLMIPFPHDQRTLAAAAAAQQGFLFPPGITYKPGDNYPVQFIPSTMAAAAASGLSPLQLQKGH   | 359 |
| Sheep_SoX-6   | QQQLLQQQHKNINLLQQQIQ-VQGHMPLMIPFPHDQRTLAAAAAAQQGFLFPPGITYKPGDNYPVQFIPSTMAAAAASGLSPLQLQKGH   | 357 |
| Cow_SoX-6     | VSHPQINPRLKGLSDRLGRSLDTFEHGGGHSYNHKEIQEQLYAAQLASMQVSPGAKMPSTPQPPNAGAVSPTGIKNEKRGTSPTVQVKDE  | 446 |
| Buffalo_SoX-6 | VSHPQINPRLKGLSDRLGRSLDTFEHGGGHSYNHKEIQEQLYAAQLASMQVSPGAKMPSTPQPPNAGAVSPTGIKNEKRGTSPTVQVKDE  | 447 |
| Goat_SoX-6    | VSHPQINPRLKGLSDRLGRSLDTFEHGGGHSYNHKEIQEQLYAAQLASMQVSPGAKMPSTPQPPNAGAVSPTGIKNEKRGTSPTVQVKDE  | 449 |
| Sheep_SoX-6   | VSHPQINPRLKGLSDRLGRSLDTFEHGGGHSYNHKEIQEQLYAAQLASMQVSPGAKMPSTPQPPNAGAVSPTGIKNEKRGTSPTVQVKDE  | 447 |
| Cow_SoX-6     | AAAQPLNLSSRPKTVPEPVKSPTSPTQSLEPASKTSPVNLPNKSSIPSPIGGSLGRGSSLGKWKSSHQEETVELDILSSINSALFGDQDT  | 536 |
| Buffalo_SoX-6 | AAAQPLNLSSRPKTVPEPVKSPTSPTQSLEPASKTSPVNLPNKSSIPSPIGGSLGRGSSLGKWKSSHQEETVELDILSSINSALFGDQDT  | 537 |
| Goat_SoX-6    | AAAQPLNLSSRPKTVPEPVKSPTSPTQSLEPASKTSPVNLPNKSSIPSPIGGSLGRGSSLGKWKSSHQEETVELDILSSINSALFGDQDT  | 539 |
| Sheep_SoX-6   | AAAQPLNLSSRPKTVPEPVKSPTSPTQSLEPASKTSPVNLPNKSSIPSPIGGSLGRGSSLGKWKSSHQEETVELDILSSINSALFGDQDT  | 537 |
| Cow_SoX-6     | VMKAIQEARMKREIQIREQQQQQPHGVGDKLSTLNNMGLNCRNEKERTRFENLGPQLTGKSSSEDGKLGPGVIDLTRPDAEGSKAMNGS   | 626 |
| Buffalo_SoX-6 | VMKAIQEARMKREIQIREQQQQQPHGVGDKLSTLNNMGLNCRNEKERTRFENLGPQLTGKSSSEDGKLGPGVIDLTRPDAEGSKAMNGS   | 627 |
| Goat_SoX-6    | VMKAIQEARMKREIQIREQQQQQPHGVGDKLSTLNNMGLNCRNEKERTRFENLGPQLTGKSSSEDGKLGPGVIDLTRPDAEGSKAMNGS   | 629 |
| Sheep_SoX-6   | VMKAIQEARMKREIQIREQQQQQPHGVGDKLSTLNNMGLNCRNEKERTRFENLGPQLTGKSSSEDGKLGPGVIDLTRPDAEGSKAMNGS   | 627 |
| Cow_SoX-6     | AAKLQYYCWP TGATVAEARVYRDARGRASSEPHIKRPMNAFMVWAKDERRKILQAFDPMHNSNISKILGSRWKSMSNQEKOPYEEQA    | 716 |
| Buffalo_SoX-6 | AAKLQYYCWP TGATVAEARVYRDARGRASSEPHIKRPMNAFMVWAKDERRKILQAFDPMHNSNISKILGSRWKSMSNQEKOPYEEQA    | 717 |
| Goat_SoX-6    | AAKLQYYCWP TGATVAEARVYRDARGRASSEPHIKRPMNAFMVWAKDERRKILQAFDPMHNSNISKILGSRWKSMSNQEKOPYEEQA    | 719 |
| Sheep_SoX-6   | AAKLQYYCWP TGATVAEARVYRDARGRASSEPHIKRPMNAFMVWAKDERRKILQAFDPMHNSNISKILGSRWKSMSNQEKOPYEEQA    | 717 |
| Cow_SoX-6     | RLSKIHLEKYPNYKYKPRPKRTCIVDGKKLRIGEYKQLMRSRRQEMRQFFTVGQQPQIPITTTGTGVVYPGAITMATTTTSPQMTSDCSST | 806 |
| Buffalo_SoX-6 | RLSKIHLEKYPNYKYKPRPKRTCIVDGKKLRIGEYKQLMRSRRQEMRQFFTVGQQPQIPITTTGTGVVYPGAITMATTTTSPQMTSDCSST | 807 |
| Goat_SoX-6    | RLSKIHLEKYPNYKYKPRPKRTCIVDGKKLRIGEYKQLMRSRRQEMRQFFTVGQQPQIPITTTGTGVVYPGAITMATTTTSPQMTSDCSST | 809 |
| Sheep_SoX-6   | RLSKIHLEKYPNYKYKPRPKRTCIVDGKKLRIGEYKQLMRSRRQEMRQFFTVGQQPQIPITTTGTGVVYPGAITMATTTTSPQMTSDCSST | 807 |
| Cow_SoX-6     | SASPEPSLPVIQSSYGMKTDGGSLAGNEMINGEDEMEMYDDYEDDPKSDYSSSENAEPAVSAN                             | 869 |
| Buffalo_SoX-6 | SASPEPSLPVIQSSYGMKTDGGSLAGNEMINGEDEMEMYDDYEDDPKSDYSSSENAEPAVSAN                             | 870 |
| Goat_SoX-6    | SASPEPSLPVIQSSYGMKTDGGSLAGNEMINGEDEMEMYDDYEDDPKSDYSSSENAEPAVSAN                             | 872 |
| Sheep_SoX-6   | SASPEPSLPVIQSSYGMKTDGGSLAGNEMINGEDEMEMYDDYEDDPKSDYSSSENAEPAVSAN                             | 870 |

**Figure S6.** Comparative amino acid analysis of Sox6 gene in cattle, buffalo, sheep, and goat

|               |                                                                                             |     |
|---------------|---------------------------------------------------------------------------------------------|-----|
| Cow_SoX-7     | -----                                                                                       | 0   |
| Buffalo_SoX-7 | MRGWSPAPAPGPRDHRRLLPPGRRHLRCELAGRGAAPGLRGTDPREPPGRRRGPGAGARWGSGPPPASPPGRSERGRCGPGRREGARAV   | 90  |
| Goat_SoX-7    | -----                                                                                       | 0   |
| Sheep_SoX-7   | -----                                                                                       | 0   |
| Cow_SoX-7     | -----MASLLGTYPWPEGLECPALEAELSDGLSPPAAP                                                      | 33  |
| Buffalo_SoX-7 | KEGGAAPPSPRVIGGRSLSKLINKGPGRCRPSWTPQPVRGPGQRPPDDAKRGDPRAAMASLLGTYPWPEGLECPALEAELSDGLSPPAAP  | 180 |
| Goat_SoX-7    | -----MASLLGTYPWPEGLECPALEAELSDGLSPPAAP                                                      | 33  |
| Sheep_SoX-7   | -----MASLLGTYPWPEGLECPALEAELSDGLSPPAAP                                                      | 33  |
| Cow_SoX-7     | RPPGDKGSESRIRRPMNAFMVWAKDERKRLAVQNPDLNHAELSKMLGKSWKALTLSQKRPHYVDEAERLRLQHMQDYPNYKYRPRRKKQAK | 123 |
| Buffalo_SoX-7 | RPPGDKGSESRIRRPMNAFMVWAKDERKRLAVQNPDLNHAELSKMLGKSWKALTLSQKRPHYVDEAERLRLQHMQDYPNYKYRPRRKKQAK | 270 |
| Goat_SoX-7    | RPPGDKGSESRIRRPMNAFMVWAKDERKRLAVQNPDLNHAELSKMLGKSWKALTLSQKRPHYVDEAERLRLQHMQDYPNYKYRPRRKKQAK | 123 |
| Sheep_SoX-7   | RPPGDKGSESRIRRPMNAFMVWAKDERKRLAVQNPDLNHAELSKMLGKSWKALTLSQKRPHYVDEAERLRLQHMQDYPNYKYRPRRKKQAK | 123 |
| Cow_SoX-7     | RLCKRVDPGFLLSSLSRDQNSLPEKRGGGRGAPGEKEDRGEYSPSALPGLRGCFHDGPAGGSGGGGTGGSVDAYPYGLPTPPEMSPLD    | 212 |
| Buffalo_SoX-7 | RLCKRVDPGFLLSSLSRDQNSLPEKRGGGRGAPGEKEDRGEYSPSALPGLRGCFHDGPAGGSGGGGTGGSVDAYPYGLPTPPEMSPLD    | 359 |
| Goat_SoX-7    | RLCKRVDPGFLLSSLSRDQNSLPEKRGGGRGAPGEKEDRGEYSPSALPGLRGCFHDGPAGGSGGGGTGGSVDAYPYGLPTPPEMSPLD    | 212 |
| Sheep_SoX-7   | RLCKRVDPGFLLSSLSRDQNSLPEKRGGGRGAPGEKEDRGEYSPSALPSLRGCFHDGPAGGSGGGGTGGSVDAYPYGLPTPPEMSPLD    | 213 |
| Cow_SoX-7     | VLEPEQTFSSPCQEDHAHSRRIAHLPGPPYSPEYAPNPLHCGHPLGSLALQSSGSVMSTVPGCPPSPAYYSQAAYPPLHSLNLAHLG     | 302 |
| Buffalo_SoX-7 | VLEPEQTFSSPCQEDHAHSRRIAHLPGPPYSPEYAPNPLHCGHPLGSLALQSSGSVMSTVSGCPPSPAYYSQAAYPPLHSLNLAHLG     | 449 |
| Goat_SoX-7    | VLEPEQTFSSPCQEDHAHSRRIAHLPGPPYSPEYAPNPLHCGHPLGSLALQSSGSVMSTVPGCPPSPAYYSQAAYPPLHSLNLAHLG     | 302 |
| Sheep_SoX-7   | VLEPEQTFSSPCQEDRAHSRRVAHLPGPPYSPEYAPNPLHCGHPLGSLALQSSGSVMSTVPGCPPSPAYYSQAAYPPLSLNLAHLG      | 303 |
| Cow_SoX-7     | QLSPPEHPGFEALDQLSQVELLGMDRNEFDQYLNTPGHPDSSAAGALSAQGAVSQVTPGTGPTETSLISVLADATATYYNSYSVS       | 387 |
| Buffalo_SoX-7 | QLSPPEHPGFEALDQLSQVELLGMDRNEFDQYLNTPGHPDSSAAGALSGQGAVSQVTPGTGPTETSLISVLADATATYYNSYSVS       | 534 |
| Goat_SoX-7    | QLSPPEHPGFDALDQLSQVELLGMDRNEFDQYLNTPGHPDSS--GALSGQGAVSQVTPGTGPTETSLISVLADATATYYNSYSVS       | 385 |
| Sheep_SoX-7   | QLSPPEHPGFDALDQLSQVELLGMDRNEFDQYLNTPGHPDSS--GALSGQGAVSQVTPGTGPTETSLISVLADATATYYNSYSVS       | 386 |

**Figure S7.** Comparative amino acid analysis of Sox7 gene in cattle, buffalo, sheep, and goat

|               |                                                                                          |                                                                             |     |
|---------------|------------------------------------------------------------------------------------------|-----------------------------------------------------------------------------|-----|
| Cow_SOX-8     | MGSRTGGALWQPLKETCCGSPRGDRSPAAAAVSGLGSGHRTATSGPRAAAQRPSTRCASLVRASPRAAFM                   | LDMSEARAQPPCSPSGT                                                           | 90  |
| Buffalo_SOX-8 | MGSRTGGALWQPLKETCCGSPRGDRSPAAAAVSGLGSGHHAATSGPRAAAQRPSTRCASLVRASPRAAFM                   | LDMSEARAQPPCSPSGT                                                           | 90  |
| Goat_SOX-8    | MGSRAEGGALWPLLKETCCGSPRGDPSAAAAVSGLGSGHCTATSDPRAAAQRPSTRCASLVRASPRAAFM                   | LDMSEARAQPPCSPSGT                                                           | 90  |
| Sheep_SOX-8   | -----                                                                                    | LDMSEARAQPPCSPSGT                                                           | 18  |
|               |                                                                                          |                                                                             |     |
| Cow_SOX-8     | ASSMSHVEDSDSDAPPSPA                                                                      | GSEGLGRAAGAGGGGRGDAEEAADERFPACIRDAVSQVLKGYDWSLVPMPVRGGGGGALKAKPHVKRPMNA     | 180 |
| Buffalo_SOX-8 | ASSMSHVEDSDSDAPPSPA                                                                      | GSEGLGRAAGAGGGGRGDAEEAADERFPACIRDAVSQVLKGYDWSLVPMPVRGGGGGALKAKPHVKRPMNA     | 180 |
| Goat_SOX-8    | ASSMSHVEDSDSDAPPSPT                                                                      | GSEGLGRAAGAGGGGRGDAEEAADERFPACIRDAVSQVLKGYDWSLVPMPVRGGGGGALKAKPHVKRPMNA     | 180 |
| Sheep_SOX-8   | ASSMSHVEDSDSDAPPSPT                                                                      | GSEGLGRAAGAGGGGRGDAEEAADERFPACIRDAVSQVLKGYDWSLVPMPVRGGGGGALKAKPHVKRPMNA     | 108 |
|               |                                                                                          |                                                                             |     |
| Cow_SOX-8     | FMVWAQAARRKLDQYPHLHNAELSKTLGKLWRLLESEKRPFVEEAERLRVQHKKDHPDYKYQPRRRKSVKTGQSDSDSGAELGHHPGS |                                                                             | 270 |
| Buffalo_SOX-8 | FMVWAQAARRKLDQYPHLHNAELSKTLGKLWRLLESEKRPFVEEAERLRVQHKKDHPDYKYQPRRRKSVKTGQSDSDSGAELGHHPGG |                                                                             | 270 |
| Goat_SOX-8    | FMVWAQAARRKLDQYPHLHNAELSKTLGKLWRLLESEKRPFVEEAERLRVQHKKDHPDYKYQPRRRKSVKTGQSDSDSGAELGHHPGG |                                                                             | 270 |
| Sheep_SOX-8   | FMVWAQAARRKLDQYPHLHNAELSKTLGKLWRLLESEKRPFVEEAERLRVQHKKDHPDYKYQPRRRKSVKTGQSDSDSGAELGHHPGG |                                                                             | 198 |
|               |                                                                                          |                                                                             |     |
| Cow_SOX-8     | MYKTDAGLGDAHHHS                                                                          | DHTGQTHGPPTPPTTPKTDLHHGGKQELKLEGRRLVDSGRQNIDFSNVDISELSSEVIGNMDTFDVHEFDQYLPL | 360 |
| Buffalo_SOX-8 | MYKTDAGLGDAHHHS                                                                          | DHTGQTHGPPTPPTTPKTDLHHGGKQELKLEGRRLVDSGRQNIDFSNVDISELSSEVIGNMDTFDVHEFDQYLPL | 360 |
| Goat_SOX-8    | VYKTDAGLGDAHHHN                                                                          | DHTGQTHGPPTPPTTPKTDLHHGGKQELKLEGRRLVDSGRQNIDFSNVDISELSSEVIGNMDTFDVHEFDQYLPL | 360 |
| Sheep_SOX-8   | VYKTDAGLGDAHHHS                                                                          | DHTGQTHGPPTPPTTPKTDLHHGGKQELKLEGRRLVDSGRQNIDFSNVDISELSSEVIGNMDTFDVHEFDQYLPL | 288 |
|               |                                                                                          |                                                                             |     |
| Cow_SOX-8     | NGHSALPAEPGPAAAGSYGGT                                                                    | SYSHSGAASIGASPVWAHKGTSPASASPTAGPPRPHIKTEQLSPGHYGDQSHGSPGHADYGSYSAQA         | 450 |
| Buffalo_SOX-8 | NGHSALPAEPGPAAAGSYGGA                                                                    | SYSHSGAAGIGASPVWAHKGTSPASASPTAGPPRPHIKTEQLSPGHYGDQSHGSPGHADFGSYSAQA         | 450 |
| Goat_SOX-8    | NGHSALPAEPGPAAAGSYGGA                                                                    | SYSHSGAASIGASPVWAHKGTSPASASPTAGPPRPHIKTEQLSPGHYGDQSHGSPGHADYGSYSAQA         | 450 |
| Sheep_SOX-8   | NGHSALPAEPGPAAAGSYGGA                                                                    | SYSHSGAASIGASPVWAHKGTSPASASPTAGPPRPHIKTEQLSPGHYGDQSHGSPGHSDYGSYSAQA         | 378 |
|               |                                                                                          |                                                                             |     |
| Cow_SOX-8     | SVTTAAPAAAASSFTSSQCDYTDLQAPSYYGPFPGYPGSLYQYPYFHSRRPYASPLLGGLSVPPAHSPPSNWEQPVYTTLTRP      |                                                                             | 534 |
| Buffalo_SOX-8 | SVTTAAPAAAASSFTSSQCDYTDLQAPSYYGPFPGYPGSLYQYPYFHSRRPYASPLLGGLSVPPAHSPPSNWEQPVYTTLTRP      |                                                                             | 534 |
| Goat_SOX-8    | SVTTAAPAAAASSFTSSQCDYTDLQAPSYYGPFPGYPGSLYQYPYFHSRRPYASPLLGGLSVPPAHSPPSNWEQPVYTTLTRP      |                                                                             | 534 |
| Sheep_SOX-8   | SVTTAAPAAAASSFTSSQCDYTDLQAPGYYSPPFPGYPGSLYQYPYFHSRRPYASPLLGGLSVPPAHSPPSNWEQPVYTTLTRP     |                                                                             | 462 |

**Figure S8.** Comparative amino acid analysis of Sox8 gene in cattle, buffalo, sheep, and goat

|               |                                                                                            |                                                                     |     |
|---------------|--------------------------------------------------------------------------------------------|---------------------------------------------------------------------|-----|
| Cow_SOX-9     | MNLLDPFVKMTDEQEKGLSAAPSPMTSEDSAGSPSPSGSGSDTENTRPQENTFPKGEPLKKSEEDKFPVCIREAVSQVLKGYDWTLPV   | 90                                                                  |     |
| Buffalo_SOX-9 | MNLLDPFVKMTDEQEKGLSAAPSPMTSEDSAGSPSPSGSGSDTENTRPQENTFPKGEPLKKSEEDKFPVCIREAVSQVLKGYDWTLPV   | 90                                                                  |     |
| Goat_SOX-9    | MNLLDPFVKMTDEQEKGLSAAPSPMTSEDSAGSPSPSGSGSDTENTRPQENTFPKGEPLKKSEEDKFPVCIREAVSQVLKGYDWTLPV   | 90                                                                  |     |
| Sheep_SOX-9   | MNLLDPFVKMTDEQEKGLSAAPSPMTSEDSAGSPSPSGSGSDTENTRPQENTFPKGEPLKKSEEDKFPVCIREAVSQVLKGYDWTLPV   | 90                                                                  |     |
| Cow_SOX-9     | MPVRVNGSSKNKPHVKRPMNAFMVWQAARRKLADQYPHLHNAELSKTLGKLWRLNNESEKRPFFVEEAERLRVQHKKDHPDYKYQPRRRK | 180                                                                 |     |
| Buffalo_SOX-9 | MPVRVNGSSKNKPHVKRPMNAFMVWQAARRKLADQYPHLHNAELSKTLGKLWRLNNESEKRPFFVEEAERLRVQHKKDHPDYKYQPRRRK | 180                                                                 |     |
| Goat_SOX-9    | MPVRVNGSSKNKPHVKRPMNAFMVWQAARRKLADQYPHLHNAELSKTLGKLWRLNNESEKRPFFVEEAERLRVQHKKDHPDYKYQPRRRK | 180                                                                 |     |
| Sheep_SOX-9   | MPVRVNGSSKNKPHVKRPMNAFMVWQAARRKLADQYPHLHNAELSKTLGKLWRLNNESEKRPFFVEEAERLRVQHKKDHPDYKYQPRRRK | 180                                                                 |     |
| Cow_SOX-9     | SVKNGQAAEEAPEQTHISPNAIFKALQADSPHSSSGMSEVHSPGEHSGSQSGPPTPPTTPKTDVQPGKADLKREGRPLPEGGRQPPIDF  | 270                                                                 |     |
| Buffalo_SOX-9 | SVKNGQAAEEAPEQTHISPNAIFKALQADSPHSSSGMSEVHSPGEHSGSQSGPPTPPTTPKTDVQPGKADLKREGRPLPEGGRQPPIDF  | 270                                                                 |     |
| Goat_SOX-9    | SVKNGQAAEEAPEQTHISPNAIFKALQADSPHSSSGMSEVHSPGEHSGSQSGPPTPPTTPKTDVQPGKADLKREGRPLPEGGRQPPIDF  | 270                                                                 |     |
| Sheep_SOX-9   | SVKNGQAAEEAPEQTHISPNAIFKALQADSPHSSSGMSEVHSPGEHSGSQSGPPTPPTTPKTDVQPGKADLKREGRPLPEGGRQPPIDF  | 270                                                                 |     |
| Cow_SOX-9     | RDVDIGELSSDVISNMETFDVHEFDQYLPPNGHPGVPATHGQVITYTGSYGVSSSTAASPAGAGHVWMSKQQAAPPPPPF           | 360                                                                 |     |
| Buffalo_SOX-9 | RDVDIGELSSDVISNMETFDVHEFDQYLPPNGHPGVPATHGQVITYTGSYGVSSSTAASPAGAGHVWMSKQQAAPPPPPF           | 360                                                                 |     |
| Goat_SOX-9    | RDVDIGELSSDVISNMETFDVHEFDQYLPPNGHPGVPATHGQVITYTGSYGVSSSTAASPAGAGHVWMSKQQAAPPPPPF           | 360                                                                 |     |
| Sheep_SOX-9   | RDVDIGELSSDVISNMETFDVHEFDQYLPPNGHPGVPATHGQVITYTGSYGVSSSTAASPAGAGHVWMSKQQAAPPPPPF           | 359                                                                 |     |
| Cow_SOX-9     | QAPPQPPAPQAPPAAPPQAPPQPPQPPPPPP                                                            | AHALGALGSEPGPAQRTHIKTEQLSPSHYSEPPQHSPPQIAYSFPFSLPHYGPSYP            | 448 |
| Buffalo_SOX-9 | QAPPQPPAPQAPPAAPPQAPPQPPQPPPPPP                                                            | AHALGALGSEPGPAQRTHIKTEQLSPSHYSEPPQHSPPQIAYSFPFSLPHYGPSYP            | 449 |
| Goat_SOX-9    | QAPPQPPAPQAPPAAPPQAPPQPPQPPPPPP                                                            | AHALGALGSEPGPAQRTHIKTEQLSPSHYSEPPQHSPPQIAYSFPFSLPHYGPSYP            | 449 |
| Sheep_SOX-9   | QAPPQPPAPQAPPAAPPQAPPQPPQPPPPPP                                                            | AHALGALGSEPGPAQRTHIKTEQLSPSHYSEPPQHSPPQIAYSFPFSLPHYGPSYP            | 449 |
| Cow_SOX-9     | PITRAQYDYN                                                                                 | DPQNSGAYYSHAAGQGSGLYSTFSYMSPAQRPMYTPPIADTSGVPSIPQTHSPQHWEQPVYTQLTRP | 524 |
| Buffalo_SOX-9 | PITRAQYDYN                                                                                 | DPQNSGAYYSHAAGQGSGLYSTFSYMSPAQRPMYTPPIADTSGVPSIPQTHSPQHWEQPVYTQLTRP | 525 |
| Goat_SOX-9    | PITRAQYDYS                                                                                 | DPQNSGAYYSHAAGQGSGLYSTFSYMSPAQRPMYTPPIADTSGVPSIPQTHSPQHWEQPVYTQLTRP | 525 |
| Sheep_SOX-9   | PITRAQYDYS                                                                                 | DPQNSGAYYSHAAGQGSGLYSTFSYMSPAQRPMYTPPIADTSGVPSIPQTHSPQHWEQPVYTQLTRP | 525 |

**Figure S9.** Comparative amino acid analysis of Sox9 gene in cattle, buffalo, sheep, and goat

|                |                                                                                            |     |
|----------------|--------------------------------------------------------------------------------------------|-----|
| Cow_SOX-10     | MAEEQDLSEVELSPVGSEEPRLSPGSAPSLGPDGGGGGGGGSGLRASPGPGELGKVKKEQQDGEADDDKFPVCIREAVSQVLSGYDWTL  | 90  |
| Buffalo_SOX-10 | MAEEQDLSEVELSPVGSEEPRLSPGSAPSLGPDGGGGGGGGSGLRASPGPGELGKVKKEQQDGEADDDKFPVCIREAVSQVLSGYDWTL  | 90  |
| Goat_SOX-10    | MAEEQDLSEVELSPVGSEEPRLSPGSAPSLGPDGGGGGGGGSGLRASPGPGELGKVKKEQQDGEADDDKFPVCIREAVSQVLSGYDWTL  | 90  |
| Sheep_SOX-10   | MAEEQDLSEVELSPVGSEEPRLSPGSAPSLGPDGGGGGGGGSGLRASPGPGELGKVKKEQQDGEADDDKFPVCIREAVSQVLSGYDWTL  | 90  |
| Cow_SOX-10     | VPMPVRVNGASKSKPHVKRPMNAFMVWQAARRKLDQYPHLHNAELSKTLGKLWRLNNESEKRPFFIEEAERLRMQHKKHDPDYKYQPRR  | 180 |
| Buffalo_SOX-10 | VPMPVRVNGASKSKPHVKRPMNAFMVWQAARRKLDQYPHLHNAELSKTLGKLWRLNNESEKRPFFIEEAERLRMQHKKHDPDYKYQPRR  | 180 |
| Goat_SOX-10    | VPMPVRVNGASKSKPHVKRPMNAFMVWQAARRKLDQYPHLHNAELSKTLGKLWRLNNESEKRPFFIEEAERLRMQHKKHDPDYKYQPRR  | 180 |
| Sheep_SOX-10   | VPMPVRVNGASKSKPHVKRPMNAFMVWQAARRKLDQYPHLHNAELSKTLGKLWRLNNESEKRPFFIEEAERLRMQHKKHDPDYKYQPRR  | 180 |
| Cow_SOX-10     | RKNGKAAQGESECPGGEAEQGGAAAIQAHYKSAHLDRHHPGEGSPMSDGNPEHPSGQSHGPPTPPTTPKTELQSGKADPKRDGRSLGEGG | 270 |
| Buffalo_SOX-10 | RKNGKAAQGESECPGGEAEQGGAAAIQAHYKSAHLDRHHPGEGSPMSDGNPEHPSGQSHGPPTPPTTPKTELQSGKADPKRDGRSLGEGG | 270 |
| Goat_SOX-10    | RKNGKAAQGESECPGGEAEQGGAAAIQAHYKSAHLDRHHPGEGSPMSDGNPEHPSGQSHGPPTPPTTPKTELQSGKADPKRDGRSLGEGG | 270 |
| Sheep_SOX-10   | RKNGKAAQGESECPGGEAEQGGAAAIQAHYKSAHLDRHHPGEGSPMSDGNPEHPSGQSHGPPTPPTTPKTELQSGKADPKRDGRSLGEGG | 270 |
| Cow_SOX-10     | KPHIDFGNVDIGEISHEVMSNMETFDVAELDQYLPPNGHPGHVGGYSAAGYGLGSALAVASGHSAWISKPPGVALPTVSPPGVDAKAQVK | 360 |
| Buffalo_SOX-10 | KPHIDFGNVDIGEISHEVMSNMETFDVAELDQYLPPNGHPGHVGGYSAAGYGLGSALAVASGHSAWISKPPGVALPTVSPPGVDAKAQVK | 360 |
| Goat_SOX-10    | KPHIDFGNVDIGEISHEVMSNMETFDVAELDQYLPPNGHPGHVGGYSAAGYGLGSALAVASGHSAWISKPPGVALPTVSPPGVDAKAQVK | 360 |
| Sheep_SOX-10   | KPHIDFGNVDIGEISHEVMSNMETFDVAELDQYLPPNGHPGHVGGYSAAGYGLGSALAVASGHSAWISKPPGVALPTVSPPGVDAKAQVK | 360 |

|                |                                                                                             |     |
|----------------|---------------------------------------------------------------------------------------------|-----|
| Cow_SOX-10     | TETAGPQGPPHYTDQPSTSQIAYTSLSLPHYGSAPPSISRPFQDYS DHQPSGPYYGHSGQTSGLYSAFSYMGPSQRPLYTAISDPSPSGP | 450 |
| Buffalo_SOX-10 | TETAGPQGPPHYTDQPSTSQIAYTSLSLPHYGSAPPSISRPFQDYS DHQPSGPYYGHSGQTSGLYSAFSYMGPSQRPLYTAISDPSPSGP | 450 |
| Goat_SOX-10    | TETAGPQGPPHYTDQPSTSQIAYTSLSLPHYGSAPPSISRPFQDYS DHQPSGPYYGHSGQTSGLYSAFSYMGPSQRPLYTAISDPSPSGP | 450 |
| Sheep_SOX-10   | TETAGPQGPPHYTDQPSTSQIAYTSLSLPHYGSAPPSISRPFQDYS DHQPSGPYYGHSGQTSGLYSAFSYMGPSQRPLYTAISDPSPSGP | 450 |
| Cow_SOX-10     | QSHSPTHWEQPVYTTLSRP                                                                         | 469 |
| Buffalo_SOX-10 | QSHSPTHWEQPVYTTLSRP                                                                         | 469 |
| Goat_SOX-10    | QSHSPTHWEQPVYTTLSRP                                                                         | 469 |
| Sheep_SOX-10   | QSHSPTHWEQPVYTTLSRP                                                                         | 469 |

**Figure S10.** Comparative amino acid analysis of Sox10 gene in cattle, buffalo, sheep, and goat

|                |                                                                                              |     |
|----------------|----------------------------------------------------------------------------------------------|-----|
| Cow_SOX-11     | MVQQAESLEAESNLPREALDTEEGEFMACSPVALDES DDPWCKTASGHIKRP MNAFMVWSKIERRKIMEQSPDMHNAEISKRLGKRWKML | 90  |
| Buffalo_SOX-11 | MVQQAESLEAESNLPREALDTEEGEFMACSPVALDES DDPWCKTASGHIKRP MNAFMVWSKIERRKIMEQSPDMHNAEISKRLGKRWKML | 90  |
| Goat_SOX-11    | MVQQAESLEAESNLPREALDTEEGEFMACSPVALDES DDPWCKTASGHIKRP MNAFMVWSKIERRKIMEQSPDMHNAEISKRLGKRWKML | 90  |
| Sheep_SOX-11   | MVQQAESLEAESNLPREALDTEEGEFMACSPVALDES DDPWCKTASGHIKRP MNAFMVWSKIERRKIMEQSPDMHNAEISKRLGKRWKML | 90  |
| Cow_SOX-11     | KDSEKIPFIREAERLR LKHMADYPDYKYRPRKKPKMDPSAKPSAGOSPEKSAAGGGGG-SAGAGAGGGA KTSKGSSKKCKGLKAPAAPAA | 179 |
| Buffalo_SOX-11 | KDSEKIPFIREAERLR LKHMADYPDYKYRPRKKPKMDPSAKPSAGOSPEKSAAGGGGG-SAGAGAGGGA KTSKGSSKKCKGLKAPAAPAA | 179 |
| Goat_SOX-11    | KDSEKIPFIREAERLR LKHMADYPDYKYRPRKKPKMDPSAKPSAGOSPEKSAAGGGGG-SAGAGAGGGA KTSKGSSKKCKGLKAPAAPAA | 180 |
| Sheep_SOX-11   | KDSEKIPFIREAERLR LKHMADYPDYKYRPRKKPKMDPSAKPSAGOSPEKSAAGGGGG-SAGAGAGGGA KTSKGSSKKCKGLKAPAAPAA | 180 |
| Cow_SOX-11     | GGAKAGAGKAAQPGDGGGAGDDYVLGSLRVSGAGKTVKCVFLDDDEDEDEDEDELQLRIKQEVDEDDDEPPPHAQLLQPPGQPPPPPLL    | 269 |
| Buffalo_SOX-11 | GGAKAGAGKAAQPGDGGGAGDDYVLGSLRVSGAGKTVKCVFLDDDEDEDEDEDELQLRIKQEVDEDDDEPPPHAQLLQPPGQPPPPPLL    | 269 |
| Goat_SOX-11    | GGAKAGAGKAAQPGDGGGAGDDYVLGSLRVSGAGKTVKCVFLDDDEDEDEDEDELQLRIKQEVDEDDDEPPPHAQLLQPPGQPPPPPLL    | 270 |
| Sheep_SOX-11   | GGAKAGAGKAAQPGDGGGAGDDYVLGSLRVSGAGKTVKCVFLDDDEDEDEDEDELQLRIKQEVDEDDDEPPPHAQLLQPPGQPPPPPLL    | 270 |
| Cow_SOX-11     | RRYSVAKVPASPTLSSAAESPEGASLYDEV RAGAASGAGGGSRLYYSFKNITKQHPPPLAQPALSPASARSVTSSSSSSSSGGGGGGG--- | 356 |
| Buffalo_SOX-11 | RRYSVAKVPASPTLSSAAESPEGASLYDEV RAGAASGAGGGSRLYYSFKNITKQHPPPLAQPALSPASARSVTSSSSSSSSGGGGGGGSS  | 359 |
| Goat_SOX-11    | RRYSVAKVPASPTLSSAAESPEGASLYDEV RAGAASGAGGGSRLYYSFKNITKQHPPPLAQPALSPASARSVTSSSSSSSSGGGGGGGSS  | 360 |
| Sheep_SOX-11   | RRYSVAKVPASPTLSSAAESPEGASLYDEV RAGAASGAGGGSRLYYSFKNITKQHPPPLAQPALSPASARSVTSSSSSSSSGGGGGGGSS  | 360 |
| Cow_SOX-11     | -SSSSSSSGGEDADDLMFDLSLNFSQS AHGAGDQQLGGGAAAGNLSLSLVDKDLDSFEGSLGSHFEFPDYCTPELSEMIAGDWLEANFS   | 445 |
| Buffalo_SOX-11 | -SSSSSSSGGEDADDLMFDLSLNFSQS AHGAGDQQLGGGAAAGNLSLSLVDKDLDSFEGSLGSHFEFPDYCTPELSEMIAGDWLEANFS   | 449 |
| Goat_SOX-11    | -SSSSSSSGGEDADDLMFDLSLNFSQS AHGAGDQQLGGGAAAGNLSLSLVDKDLDSFEGSLGSHFEFPDYCTPELSEMIAGDWLEANFS   | 449 |
| Sheep_SOX-11   | -SSSSSSSGGEDADDLMFDLSLNFSQS AHGAGDQQLGGGAAAGNLSLSLVDKDLDSFEGSLGSHFEFPDYCTPELSEMIAGDWLEANFS   | 448 |
| Cow_SOX-11     | DLVFTY                                                                                       | 451 |
| Buffalo_SOX-11 | DLVFTY                                                                                       | 455 |
| Goat_SOX-11    | DLVFTY                                                                                       | 455 |
| Sheep_SOX-11   | DLVFTY                                                                                       | 454 |

**Figure S11.** Comparative amino acid analysis of Sox11 gene in cattle, buffalo, sheep, and goat

|                |                                                                                          |     |
|----------------|------------------------------------------------------------------------------------------|-----|
| Cow_SOX-12     | MVQQRGARAKRDGGPPPGPGPAEEGAREPGWCKTPSGHIKRPMAFMVWSQHERRKIMDQWPDHNAEISKRLGRRWQLLDSEKIPFV   | 90  |
| Buffalo_SOX-12 | MVQQRGARAKRDGGPPPGPGPAEEGAREPGWCKTPSGHIKRPMAFMVWSQHERRKIMDQWPDHNAEISKRLGRRWQLLDSEKIPFV   | 90  |
| Goat_SOX-12    | MVQQRGARAKRDGGPPPGPGPAEEGAREPGWCKTPSGHIKRPMAFMVWSQHERRKIMDQWPDHNAEISKRLGRRWQLLDSEKIPFV   | 90  |
| Sheep_SOX-12   | MVQQRGARAKRDGGPPPGPGPAEEGAREPGWCKTPSGHIKRPMAFMVWSQHERRKIMDQWPDHNAEISKRLGRRWQLLDSEKIPFV   | 90  |
| Cow_SOX-12     | REAERLRLKHMADYPDYKYRPRKSKGAPAKARPRPPGGGGGSRLLKPGPQLPGRGRRRAAGGPLGGGAAAPEDDDDEDEELLEVLVE  | 180 |
| Buffalo_SOX-12 | REAERLRLKHMADYPDYKYRPRKSKGAPAKARPRPPGGGGGSRLLKPGPQLPGRGRRRAAGGPLGGGAAAPEDDDDEDEELLEVLVE  | 180 |
| Goat_SOX-12    | REAERLRLKHMADYPDYKYRPRKSKGAPAKARPRPPGGGGGSRLLKPGPQLPGRGRRRAAGGPLGGGAAAPEDDDDEDEELLEVLVE  | 180 |
| Sheep_SOX-12   | REAERLRLKHMADYPDYKYRPRKSKGAPAKARPRPPGGGGGSRLLKPGPQLPGRGRRRAAGGPLGGGAAAPEDDDDEDEELLEVLVE  | 180 |
| Cow_SOX-12     | TPGRELWRMVPAGRAARGPVERAQGPSGEGAAVTAASPTPSEDEEPEEEEEEEEEEEGEEKVASGEEPLGFLSRGPPGPAGLDCSALD | 270 |
| Buffalo_SOX-12 | TPGRELWRMVPAGRAARGPVERAQGPSGEGAAVTAASPTPSEDEEPEEEEEEEEEEEGEEKVASGEEPLGFLSRGPPGPAGLDCSALD | 270 |
| Goat_SOX-12    | TPGRELWRMVPAGRAARGPVERAQGPSGEGAAVTAASPTPSEDEEPEEEEEEEEEEEGEEKVASGEEPLGFLSRGPPGPAGLDCSALD | 270 |
| Sheep_SOX-12   | TPGRELWRMVPAGRAARGPVERAQGPSGEGAAVTAASPTPSEDEEPEEEEEEEEEEEGEEKVASGEEPLGFLSRGPPGPAGLDCSALD | 270 |
| Cow_SOX-12     | RDPDLPPPSGTSHFEFPDYCTPEVTEMIAGDWRPSSIADLVFTY                                             | 314 |
| Buffalo_SOX-12 | RDPDLPPPSGTSHFEFPDYCTPEVTEMIAGDWRPSSIADLVFTY                                             | 314 |
| Goat_SOX-12    | RDPDLPPPSGTSHFEFPDYCTPEVTEMIAGDWRPSSIADLVFTY                                             | 314 |
| Sheep_SOX-12   | RDPDLPPPSGTSHFEFPDYCTPEVTEMIAGDWRPSSIADLVFTY                                             | 314 |

**Figure S12.** Comparative amino acid analysis of Sox12 gene in cattle, buffalo, sheep, and goat

|                |                                                                                             |                             |     |
|----------------|---------------------------------------------------------------------------------------------|-----------------------------|-----|
| Cow_SOX-13     | MERPGAAPAAPPPPGWPPRFPGLTSPRSWKQAPFLHPFLMMSMRSPGSAQLVLDEVGTMVNC                              | TVKAEKKKEPCYEDPQGSATAAHSQPG | 90  |
| Buffalo_SOX-13 | MERPRAAAAAPPPPGWPPRFPGLTSPRSWKQAPFLHPFLMMSMRSPGSAQLVLDEVGTMVNC                              | TVKAEKKKEPCYEDPQGSATAAHSQPG | 90  |
| Goat_SOX-13    | -----MMSMRSPGSAQLVLDEVGTMVNC                                                                | SVKAEKKKEPCYEDPQGSATAAHLQPG | 49  |
| Sheep_SOX-13   | MERAGAAPAAPPPPGWPPRFPGLTSPRSWKQAPFLHPFLMMSMRSPGSAQLVLDEVGTMVNC                              | SVKAEKKKEPCYEDPQGSATAAHSQPG | 90  |
| Cow_SOX-13     | DPARTFPQNGADPQAPTQGGDRDIQCVSQDSSSLENSESPEPRRPGGSEAASGSQEKLDFNRLKEVVPAIEKLLSSD               | WKEKFLGRSSVETK              | 180 |
| Buffalo_SOX-13 | DPARTFPQNGADPQAPAQGGDRDIQCVLQDSSSLENSESPEPRRPGGSEAASGSQEKLDFNRLKEVVPAIEKLLSSD               | WKEKFLGRSSVETK              | 180 |
| Goat_SOX-13    | DPARPAQNGADLQAPAQ-----DSSSLENSESPEPRRPGGSEAASGSQEKLDFNRLKEVVPAIEKLLSSD                      | WKEKFLGRSSVETK              | 129 |
| Sheep_SOX-13   | DPARPAQNGADLQAPAQ-----DSSSPENSESPEPRRPGGSEAASGSQEKLDFNRLKEVVPAIEKLLSSD                      | WKEKFLGRSSVETK              | 170 |
| Cow_SOX-13     | DVKGTKESLAEKELQLLVMIHQLSALRDQLLTAHSEQKNMAAMLLEKQQQOMELARQQQEQTAKQQQQLIQQQHKINLLQQQIQQVNMMPY |                             | 270 |
| Buffalo_SOX-13 | DVKGTKESLAEKELQLLVMIHQLSALRDQLLTAHSEQKNMAAMLLEKQQQOMELARQQQEQTAKQQQQLIQQQHKINLLQQQIQQVNMMPY |                             | 270 |
| Goat_SOX-13    | DVKGTKESLAEKELQLLVMIHQLSALRDQLLTAHSEQKNMAAMLLEKQQQOMELARQQQEQTAKQQQQLIQQQHKINLLQQQIQQVNMMPY |                             | 219 |
| Sheep_SOX-13   | DVKGTKESLAEKELQLLVMIHQLSALRDQLLTAHSEQKNMAAMLLEKQQQOMELARQQQEQTAKQQQQLIQQQHKINLLQQQIQQVNMMPY |                             | 260 |
| Cow_SOX-13     | VMIPAFPPSHQPLPVTTPDSQLALPIQPIPCPKVEYPLQLLHSPPAFVVKRPGALFAHHPLQEPSQPLNLTAKPKASELPNSSSSPNLKLS |                             | 360 |
| Buffalo_SOX-13 | VMIPAFPPSHQPLPVTTPDSQLALPIQPIPCPKVEYPLQLLHSPPAFVVKRPGALFAHHPLQEPSQPLNLTAKPKASELPNSSSSPNLKLS |                             | 360 |
| Goat_SOX-13    | VMIPAFPPSHQPLPVTTPDSQLALPIQPIPCPKVEYPLQLLHSPPAFVVKRPGPLSAHHPLQEPSQPLNLTAKPKASELPNSSSSPNLKLS |                             | 309 |
| Sheep_SOX-13   | VMIPAFPPGHQPLPVTTPDSQLALPIQPIPCPKVEYPLQLLHSPPAFVVKRPGPLSAHHPLQEPSQPLNLTAKPKASELPNSSSSPNLKLS |                             | 350 |

|                |                                                                                            |     |
|----------------|--------------------------------------------------------------------------------------------|-----|
| Cow_SOX-13     | NCGPRPPSHGAPTLDLQANPPSLPLGFLGEGDAVTKAIQDARQLLHGHSALDTSPSAPFRKDLISVDTSPAKERLEDSCVHPLEEAMLG  | 450 |
| Buffalo_SOX-13 | NCGPRPPSHGAPTLDLQANPPSLPLGFLGEGDAVTKAIQDARQLLHGHSALDTSPSAPFRKDLISVDTSPAKERLEDSCVHPLEEAMLG  | 450 |
| Goat_SOX-13    | NCGPRPPSHGAPTLDLQANPPSLPLGFLGEGDAVTKAIQDARQLLHGHSALDTSPSAPFRKDLISVDTSPAKERLEDSCVHPLEEAMLG  | 399 |
| Sheep_SOX-13   | NCGPRPPSHGAPTLDLQANPPSLPLGFLGEGDAVTKAIQDARQLLHGHSALDTSPSAPFRKDLISVDTSPAKERLEDSCVHPLEEAMLG  | 440 |
| Cow_SOX-13     | CDMDGSRHFPESRNSSHIKRPMAFMVWAKDERRKILQAFPMHNSISIKILGSRWKSMSNQERQPYEEQARLSRQHLEKYPDYKYPKPR   | 540 |
| Buffalo_SOX-13 | CDMDGSRHFPESRNSSHIKRPMAFMVWAKDERRKILQAFPMHNSISIKILGSRWKSMSNQERQPYEEQARLSRQHLEKYPDYKYPKPR   | 540 |
| Goat_SOX-13    | CDMDGSRHFPESRNSSHIKRPMAFMVWAKDERRKILQAFPMHNSISIKILGSRWKSMSNQERQPYEEQARLSRQHLEKYPDYKYPKPR   | 489 |
| Sheep_SOX-13   | CDMDGSRHFPESRNSSHIKRPMAFMVWAKDERRKILQAFPMHNSISIKILGSRWKSMSNQERQPYEEQARLSRQHLEKYPDYKYPKPR   | 530 |
| Cow_SOX-13     | PKRTCIVEGKRLRVGEYKALMTRRRQDARQSYATPQQTSGVQMSPSSEVLYPRVAGVPLAQPLVEHCVPRLDPNMPVIVNTCSLREEGEG | 630 |
| Buffalo_SOX-13 | PKRTCIVEGKRLRVGEYKALMTRRRQDARQSYATPQQTSGVQMSPSSEVLYPRVAGVPLAQPLVEHCVPRLDPNMPVIVNTCSLREEGEG | 630 |
| Goat_SOX-13    | PKRTCIVEGKRLRVGEYKALMTRRRQDARQSYATPQQTSGVQMSPSSEVLYPRVAGVPLAQPLVEHCVPRLDPNMPVIVNTCSLREEGEG | 579 |
| Sheep_SOX-13   | PKRTCIVEGKRLRVGEYKALMTRRRQDARQSYATPQQTSGVQMSPSSEVLYPRVAGVPLAQPLVEHCVPRLDPNMPVIVNTCSLREEGEG | 620 |
| Cow_SOX-13     | TEDRHSAADGEVYRYSEDEDSEGEKSDGELVVLT                                                         | 666 |
| Buffalo_SOX-13 | TEDRHSAADGEVYRYSEDEDSEGEKSDGELVVLT                                                         | 666 |
| Goat_SOX-13    | AEDRHSAADGEVYRYSEDEDSEGEKSDGELVVLT                                                         | 615 |
| Sheep_SOX-13   | AEDRHSAADGEVYRYSEDEDSEGEKSDGELVVLT                                                         | 656 |

**Figure S13.** Comparative amino acid analysis of Sox13 gene in cattle, buffalo, sheep, and goat

|                |                                                                                              |     |
|----------------|----------------------------------------------------------------------------------------------|-----|
| Cow_SOX-14     | MSKPSDHIKRPMAFMVWSRGQRRKMAQENPKMHNSEISKRLGAEWKLLSEAEKRPYIDEAKRLRAQHMKEHPDYKYRPRRKPNLLKKD     | 90  |
| Buffalo_SOX-14 | MSKPSDHIKRPMAFMVWSRGQRRKMAQENPKMHNSEISKRLGAEWKLLSEAEKRPYIDEAKRLRAQHMKEHPDYKYRPRRKPNLLKKD     | 90  |
| Goat_SOX-14    | MSKPSDHIKRPMAFMVWSRGQRRKMAQENPKMHNSEISKRLGAEWKLLSEAEKRPYIDEAKRLRAQHMKEHPDYKYRPRRKPNLLKKD     | 90  |
| Sheep_SOX-14   | MSKPSDHIKRPMAFMVWSRGQRRKMAQENPKMHNSEISKRLGAEWKLLSEAEKRPYIDEAKRLRAQHMKEHPDYKYRPRRKPNLLKKD     | 90  |
| Cow_SOX-14     | RYVFPLPYLGD TDPLKAAGLPVGASDGLLSAPEKARAF LPPASAPYSLDPAQFSSSAIQKMGEVPHTLATGALPYASTLG YQNGAFGSL | 180 |
| Buffalo_SOX-14 | RYVFPLPYLGD TDPLKAAGLPVGASDGLLSAPEKARAF LPPASAPYSLDPAQFSSSAIQKMGEVPHTLATGALPYASTLG YQNGAFGSL | 180 |
| Goat_SOX-14    | RYVFPLPYLGD TDPLKAAGLPVGASDGLLSAPEKARAF LPPASAPYSLDPAQFSSSAIQKMGEVPHTLATGALPYASTLG YQNGAFGSL | 180 |
| Sheep_SOX-14   | RYVFPLPYLGD TDPLKAAGLPVGASDGLLSAPEKARAF LPPASAPYSLDPAQFSSSAIQKMGEVPHTLATGALPYASTLG YQNGAFGSL | 180 |
| Cow_SOX-14     | SCPSQHTHTHPSTNPGYVVPNCNTAWSASTLQPPVAYILFPGMTKTGIDPYSSAHATAM                                  | 240 |
| Buffalo_SOX-14 | SCPSQHTHTHPSTNPGYVVPNCNTAWSASTLQPPVAYILFPGMTKTGIDPYSSAHATAM                                  | 240 |
| Goat_SOX-14    | SCPSQHTHTHPSTNPGYVVPNCNTAWSASTLQPPVAYILFPGMTKTGIDPYSSAHATAM                                  | 240 |
| Sheep_SOX-14   | SCPSQHTHTHPSTNPGYVVPNCNTAWSASTLQPPVAYILFPGMTKTGIDPYSSAHATAM                                  | 240 |

**Figure S14.** Comparative amino acid analysis of Sox14 gene in cattle, buffalo, sheep, and goat

|                |                                                                                          |     |
|----------------|------------------------------------------------------------------------------------------|-----|
| Cow_SOX-15     | MAVPGSSHDQAWNLDPTPTAPTSSSSGQEREGAGSPVVSRLPLEKVKRPMNAFMVWSSAQRRQMAQQNPKMHNSEISKRLGAQWKLL  | 90  |
| Buffalo_SOX-15 | MAVPGSSHDQAWNLDPTPTAPTSSSSGQEREGAGSPVVSRLPLEKVKRPMNAFMVWSSAQRRQMAQQNPKMHNSEISKRLGAQWKLL  | 90  |
| Goat_SOX-15    | MAVPGSSHDQAWNLDPTPTAPTSSSSGQEREGAGSPVVSRLPLEKVKRPMNAFMVWSSAQRRQMAQQNPKMHNSEISKRLGAQWKLL  | 90  |
| Sheep_SOX-15   | MAVPGSSHDQAWNLDPTPTAPTSSSSGQEREGAGSPVVSRLPLEKVKRPMNAFMVWSSAQRRQMAQQNPKMHNSEISKRLGAQWKLL  | 90  |
|                |                                                                                          |     |
| Cow_SOX-15     | GEDEKRPFVEEAKRLRARHLRDYPDYKYRPRRKTSAGAGSPHFSQSGSGVAGGGPVWGPYAAANQSGRFGYQPPNYSTAYLPGSYGSS | 180 |
| Buffalo_SOX-15 | GEDEKRPFVEEAKRLRARHLRDYPDYKYRPRRKTSAGAGSPHFSQSGSGVAGGGPVWGPYAAANQSGRFGYQPPNYSTAYLPGSYGSS | 180 |
| Goat_SOX-15    | GEDEKRPFVEEAKRLRARHLRDYPDYKYRPRRKTSAGAGSPHFSQSGSGVAGSGPVWGPYAAANQSGRFGYQPPNYSTAYLPGSYGSS | 180 |
| Sheep_SOX-15   | GEDEKRPFVEEAKRLRARHLRDYPDYKYRPRRKTSAGAGSPHFSQSGSGVAGSGPVWGPYAAANQSGRFGYQPPNYSTAYLPGSYGSS | 180 |
|                |                                                                                          |     |
| Cow_SOX-15     | HCKPEGSPSCSLPQSNPRLQGELLTAYSPLYEPGSPPLYNPPLSGTPLPLTHL                                    | 233 |
| Buffalo_SOX-15 | HCKPEGSPSCSLPQSNPRLQGELLTAYSPLYEPGSPPLYNPPLSGTPLPLTHL                                    | 233 |
| Goat_SOX-15    | HCKPEGSPSCSLPQSNPRLQGELLTAYSPLYEPGSPPLYNPPLSGTPLPLTHL                                    | 233 |
| Sheep_SOX-15   | HCKPEGSPSCSLPQSNPRLQGELLTAYSPLYEPGSPPLYNPPLSGTPLPLTHL                                    | 233 |

**Figure S15.** Comparative amino acid analysis of Sox15 gene in cattle, buffalo, sheep, and goat

|                |                                                                                             |     |
|----------------|---------------------------------------------------------------------------------------------|-----|
| Cow_SOX-17     | MSSPDAGYASDEQSQPRSAIPAVMAGLGPCPWAESLSPLGDMKMKGEAAASAGAPAGPAGRAKGESRIRRPMAFMVWAKDERKRLAQQN   | 90  |
| Buffalo_SOX-17 | MSSPDAGYASDEQSQPRSAIPAVMAGLGPCPWAESLSPLGDMKMKGEAAASGGAPAGPAGRAKGESRIRRPMAFMVWAKDERKRLAQQN   | 90  |
| Goat_SOX-17    | MSSPDAGYASDEQSQPRSAIPAVMAGLGPCPWAESLSPLGDMKMKGEAAASGGAPAGPAGRAKGESRIRRPMAFMVWAKDERKRLAQQN   | 90  |
| Sheep_SOX-17   | MSSPDAGYASDEQSQPRSAIPAVMAGLGPCPWAESLSPLGDMKMKGEAAASGGAPAGPAGRAKGESRIRRPMAFMVWAKDERKRLAQQN   | 90  |
|                |                                                                                             |     |
| Cow_SOX-17     | PDLHNAELSKMLGKSWKALTAEKRPFVEEAERLRVQHMQDHPNYKYRPRRRQVKRLKRVEGGFLHGLAEPPAAALGPEGGRVAMDGLG    | 180 |
| Buffalo_SOX-17 | PDLHNAELSKMLGKSWKALTAEKRPFVEEAERLRVQHMQDHPNYKYRPRRRQVKRLKRVEGGFLHGLAEPPAAALGPEGGRVAMDGLG    | 180 |
| Goat_SOX-17    | PDLHNAELSKMLGKSWKALTAEKRPFVEEAERLRVQHMQDHPNYKYRPRRRQVKRLKRVEGGFLHGLAEPPAAALGPEGGRVAMDGLG    | 180 |
| Sheep_SOX-17   | PDLHNAELSKMLGKSWKALTAEKRPFVEEAERLRVQHMQDHPNYKYRPRRRQVKRLKRVEGGFLHGLAEPPAAALGPEGGRVAMDGLG    | 180 |
|                |                                                                                             |     |
| Cow_SOX-17     | LPFPEQGFPAGPPLLPPHLGGHYRDCPGLGAPQLDGYLPTPDTSPLDGVEPDPAFFAAPLPADCPAPGPYSYAPAADYAGPPEPPGAGP   | 270 |
| Buffalo_SOX-17 | LPFPEQGFPAGPPLLPPHLGGHYRDCPGLGAPQLDGYLPTPDTSPLDGVEPDPAFFAAPLPADCPAPGPYSYAPAADYAGPPEPPGAGP   | 270 |
| Goat_SOX-17    | LPFPEQGFPAGPPLLPPHLGGHYRDCPGLGAPQLDGYLPTPDTSPLDGVEPDPAFFAAPLPADCPAPGPYSYAPAADYAGPPEPPGAGP   | 270 |
| Sheep_SOX-17   | LPFPEQGFPAGPPLLPPHLGGHYRDCPGLGAPQLDGYLPTPDTSPLDGVEPDPAFFAAPLPADCPAPGPYSYAPAADYAGPPEPPGAGP   | 270 |
|                |                                                                                             |     |
| Cow_SOX-17     | LHPRLGPEPAGPAMPGLLAPPSALHMYIGPVGSQAAAAGGGGRGFQMPQPPEHGGPGQSPPPPEALHCRDSAEPGAPAEELLGEVERTEFE | 360 |
| Buffalo_SOX-17 | LHPRLGPEPAGPAMPGLLAPPSALHMYIGPVGSQAAAAGGGGRGFQMPQPPEHGGPGQSPPPPEALHCRDSAEPGAPAEELLGEVERTEFE | 360 |
| Goat_SOX-17    | LHPRLGPETAGPAMPGLLAPPSALHMYIGPVGSQAAAAGGGGRGFQMPQPPEHGGPGQSPPPPEALHCRDSAEPGAPAEELLGEVERTEFE | 360 |
| Sheep_SOX-17   | LHPRLGPETAGPAMPGLLAPPSALHMYIGPVGSQAAAAGGGGRGFQMPQPPEHGGPGQSPPPPEALHCRDSAEPGAPAEELLGEVERTEFE | 360 |
|                |                                                                                             |     |
| Cow_SOX-17     | QYLHFVCKPEMGLPYPGHDAGVTLPDGHGALSSVVS DASSAVYYCNYPDV                                         | 410 |
| Buffalo_SOX-17 | QYLHFVCKPEMGLPYPGHDAGVTLPDGHGALSSVVS DASSAVYYCNYPDV                                         | 410 |
| Goat_SOX-17    | QYLHFVCKPEMGLPYPGHDAGVTLPDGHGALSSVVS DASSAVYYCNYPDV                                         | 410 |
| Sheep_SOX-17   | QYLHFVCKPEMGLPYPGHDAGVTLPDGHGALSSVVS DASSAVYYCNYPDV                                         | 410 |

**Figure S16.** Comparative amino acid analysis of Sox17 gene in cattle, buffalo, sheep, and goat

|                |                                                                                               |     |
|----------------|-----------------------------------------------------------------------------------------------|-----|
| Cow_SOX-18     | MQRSPLGYGAQDDPPARRDCAWAPGPGAAAEPRLPAVPVVP---TAPAAPASPPSPRRSPRSPEPGRYGLSPAGRGERQGTDESRIIR      | 87  |
| Buffalo_SOX-18 | MQRSPLGYGAQDDPPARRDCAWAPGPGAAAEPRLPAVPVVP---TAPAAPASPPSPRRSPRSPEPGRYGLSPAGRGERQGTDESRIIR      | 87  |
| Goat_SOX-18    | MQRSPLGYGAQDDPPARRDCAWAPGPGAAAEPRLPAVPVVPVAPTAPAAPASPPSPRRSPRSPEPGRYGLSPAGRGERQGTDESRIIR      | 90  |
| Sheep_SOX-18   | MQRSPLGYGAQDDPPARRDCAWAPGPGAAAEPRLPAVPVVP---TAPAAPASPPSPRRSPRSPEPGRYGLSPAGRGERQGTDESRIIR      | 87  |
| Cow_SOX-18     | PMNAFMVWAKDERKRRLAQONPDLHNAVLSKMLGKAWKELSPA EKRPFVEEAERLRVQHRLDHPNYKYP RRRKKQARKARRLEPGLLLPGL | 177 |
| Buffalo_SOX-18 | PMNAFMVWAKDERKRRLAQONPDLHNAVLSKMLGKAWKELSPA EKRPFVEEAERLRVQHRLDHPNYKYP RRRKKQARKARRLEPGLLLPGL | 177 |
| Goat_SOX-18    | PMNAFMVWAKDERKRRLAQONPDLHNAVLSKMLGKAWKELSPA EKRPFVEEAERLRVQHRLDHPNYKYP RRRKKQARKARRLESGLLLPGL | 180 |
| Sheep_SOX-18   | PMNAFMVWAKDERKRRLAQONPDLHNAVLSKMLGKAWKELSPA EKRPFVEEAERLRVQHRLDHPNYKYP RRRKKQARKARRLESGLLLPGL | 177 |
| Cow_SOX-18     | APPPPPPPPE--FFPAATGPARVFRELPLPGA EFDGLGLTPERSPLDGLPEGA AAFPPPAAPEDCSLRAFRAPYGAELPRNPGGCFCG    | 265 |
| Buffalo_SOX-18 | APPPPPPPPE--FFPAATGPARVFRELPLPGA EFDGLGLTPERSPLDGLPEGA AAFPPPAAPEDCSLRAFRAPYGAELPRNPGGCFCG    | 265 |
| Goat_SOX-18    | APPPPPPPPE-FFPAATGPARVFRELPLPGA EFDGLGLTPERSPLDGLPEGA AAFPPPAAPEDCSLRAFRAPYGAELPRNPGGCFCG     | 269 |
| Sheep_SOX-18   | APPPPPPPPEFFPAATGPARVFRELPLPGA EFDGLGLTPERSPLDGLPEGA AAFPPPAAPEDCSLRAFRAPYGAELPRNPGGCFCG      | 267 |
| Cow_SOX-18     | APPAEALRTAPGPAAQLCGLYYSAPGAPGPGP--YPGPLSPPEAPPLESAEPLGPAADLWADVDLTEFDQYLNCSRTRPDAAGLPYHVA     | 353 |
| Buffalo_SOX-18 | APPAEALRTAPGPAAQLCGLYYSAPGAPGPGP--YPGPLSPPEAPPLESAEPLGPAADLWADVDLTEFDQYLNCSRTRPDAAGLPYHVA     | 355 |
| Goat_SOX-18    | APPAEALRTAPGPAAQLCGLYYSAPGAPGPGP--YPGPLSPPEAPPLESAEPLGPAADLWADVDLTEFDQYLNCSRTRPDAAGLPYHVA     | 357 |
| Sheep_SOX-18   | APPAEALRTAPGPAAQLCGLYYSAPGAPGPGP--YPGPLSPPEAPPLESAEPLGPAADLWADVDLTEFDQYLNCSRTRPDAAGLPYHVA     | 355 |
| Cow_SOX-18     | LAKLAPRTMSCPEESSLIAALSDASSAVVYSACISG                                                          | 389 |
| Buffalo_SOX-18 | LAKLAPRTMTCPPESSLIAALSDASSAVVYSACISG                                                          | 391 |
| Goat_SOX-18    | LAKLAPRTMSCPEESSLIAALSDASSAVVYSACISG                                                          | 393 |
| Sheep_SOX-18   | LAKLAPRTMSCPEESSLIAALSDASSAVVYSACISG                                                          | 391 |

**Figure S17.** Comparative amino acid analysis of Sox18 gene in cattle, buffalo, sheep, and goat

|                |                                                                                               |     |
|----------------|-----------------------------------------------------------------------------------------------|-----|
| Cow_SOX-21     | MSKPVDHVKRPMNAFMVWSRAQRRKMAQENPKMHNSEISKRLGA EWKLLTESEKRPFIDEAKRLRAMHMK EHPDYKYRPRRKPKTLLKKD  | 90  |
| Buffalo_SOX-21 | MSKPVDHVKRPMNAFMVWSRAQRRKMAQENPKMHNSEISKRLGA EWKLLTESEKRPFIDEAKRLRAMHMK EHPDYKYRPRRKPKTLLKKD  | 90  |
| Goat_SOX-21    | MSKPVDHVKRPMNAFMVWSRAQRRKMAQENPKMHNSEISKRLGA EWKLLTESEKRPFIDEAKRLRAMHMK EHPDYKYRPRRKPKTLLKKD  | 90  |
| Sheep_SOX-21   | MSKPVDHVKRPMNAFMVWSRAQRRKMAQENPKMHNSEISKRLGA EWKLLTESEKRPFIDEAKRLRAMHMK EHPDYKYRPRRKPKTLLKKD  | 90  |
| Cow_SOX-21     | KFAFPVPYGLGGVADAEHPALKAGAGLHAGAGSGGLVPESLLANPEKAAAAA AAAAAAARVFFPQSAAAAA AAAAAAAGSPYSLLDLGSKM | 180 |
| Buffalo_SOX-21 | KFAFPVPYGLGGVADAEHPALKAGAGLHAGAGSGGLVPESLLANPEKAAAAA AAAAAAARVFFPQSAAAAA AAAAAAAGSPYSLLDLGSKM | 180 |
| Goat_SOX-21    | KFAFPVPYGLGGVADAEHPALKAGAGLHAGAGSGGLVPESLLANPEKAAAAA AAAAAAARVFFPQSAAAAA AAAAAAAGSPYSLLDLGSKM | 180 |
| Sheep_SOX-21   | KFAFPVPYGLGGVADAEHPALKAGAGLHAGAGSGGLVPESLLANPEKAAAAA AAAAAAARVFFPQSAAAAA AAAAAAAGSPYSLLDLGSKM | 180 |
| Cow_SOX-21     | AEISSSSSGLPYASSLGYPTAGAGAFHGAAAAA AAAAAAAGGHTSHSPSGNPGYMIPCNC SAWPSPGLQPPLAYIILLPGMGKPQLDPYP  | 270 |
| Buffalo_SOX-21 | AEISSSSSGLPYASSLGYPTAGAGAFHGAAAAA AAAAAAAGGHTSHSPSGNPGYMIPCNC SAWPSPGLQPPLAYIILLPGMGKPQLDPYP  | 270 |
| Goat_SOX-21    | AEISSSSSGLPYASSLGYPTAGAGAFHGAAAAA AAAAAAAGGHTSHSPSGNPGYMIPCNC SAWPSPGLQPPLAYIILLPGMGKPQLDPYP  | 270 |
| Sheep_SOX-21   | AEISSSSSGLPYASSLGYPTAGAGAFHGAAAAA AAAAAAAGGHTSHSPSGNPGYMIPCNC SAWPSPGLQPPLAYIILLPGMGKPQLDPYP  | 270 |
| Cow_SOX-21     | AAAAAAL                                                                                       | 277 |
| Buffalo_SOX-21 | AAAAAAL                                                                                       | 277 |
| Goat_SOX-21    | AAAAAAL                                                                                       | 277 |
| Sheep_SOX-21   | AAAAAAL                                                                                       | 277 |

**Figure S18.** Comparative amino acid analysis of Sox21 gene in cattle, buffalo, sheep, and goat

|                |                                                                                             |     |
|----------------|---------------------------------------------------------------------------------------------|-----|
| Cow_SOX-30     | MERARPEQPPQQRQLPRATPPRPLRPAPPLPVEGASFRAAAATEPSPSPPTPCAAAATVASSCGEPSASGVQPAARRLLQVKPEQVLLL   | 90  |
| Buffalo_SOX-30 | MERARPEQPPQQRQLPRATPPRPLRPAPPLPVEGASFRAAVTEPSPSPPTPCAAAATVASSCGEPSASGVQPAARRLLQVKPEQVLLL    | 90  |
| Goat_SOX-30    | MERARPEQPPQQRQLPRATPPRPLRPAPPLPVEGASFRAAAAEPSPSPTPCAAAATVASSCGEPSASGVQPAARRLLQVKPEQVLLL     | 90  |
| Sheep_SOX-30   | MERARPEQPPQQRQLPRATPPRPLRPAPPLPVEGASFRAAAAEPSPSPTPCAAAATVASSCGEPSASGVQPAARRLLQVKPEQVLLL     | 90  |
|                |                                                                                             |     |
| Cow_SOX-30     | PPGPPLPQAREESAATSPAQARLLQLRPELLLLPPPPPASEGIPCRPELHPLQPRALHVKAEKQEPGPGDLLAGPRRAVEACPKTSRTV   | 180 |
| Buffalo_SOX-30 | PPGPPLPQAREEGAATSPAQARLLQLRSELLLLPPPPPASEGIPCRPELHPLQPRALHVKAEKQEPGPGDLLAGPRRAVEACPKTSRRV   | 180 |
| Goat_SOX-30    | PPGPPLPQAREEGAATSPAQARLLQLRPELLLLPPPPPASEGVPCELPPELHPLQPRALHVKAEKQEPGPGDLLAGPRRAVEACPKTSRTV | 180 |
| Sheep_SOX-30   | PPGPPLPQAREEGAATSPAQARLLQLRPELLLLPPPPPASEGVPCELPPELHPLQPRALHVKAEKQDPGPGDLLAGPRRAVEACPKTSRTV | 180 |
|                |                                                                                             |     |
| Cow_SOX-30     | KAEGSGPLNSRRGEKKKLEAEIIVSYAAKGEEGKSLAVLREGVIKTEAPERLREDCRLSTEPASNGLAHGSKDVILTQPSAFGPHQQ     | 270 |
| Buffalo_SOX-30 | KAEGSGPLNSRRGEKKKLEAEIIVSYAAKGEEGKSLAVLREGVIKTEAPERLREDCRLSTEPASNGLAHGSKDVILTQPSAFGPHQQ     | 270 |
| Goat_SOX-30    | KAEGSGPLNSRRGEKKKLEAEIIVSYAAKGEEGKSLAALREGVIKTEAPERLREDCRLSTEPASNGLAHGSKDVILTQPSAFGPHQQ     | 270 |
| Sheep_SOX-30   | KGECSGPLNSRRGEKKKLEAEIIVSYAKGEEGKSLAALREGGIKTEAPERLREDCRLSTEPASNGLAHGSKDVILTQPSAFGPHQQ      | 270 |
|                |                                                                                             |     |
| Cow_SOX-30     | DLRIPLTLHTVPPGARIQFQGPPSELIRLTKVPLTPVPIKMQSLLEPSVKIETKDVPLTVLPSDAGIPDTPFSKDRNGHVKRPMAFMV    | 360 |
| Buffalo_SOX-30 | DLRIPLTLHTVPPGARIQFQGPPSELIRLTKVPLTPVPIKMQSLLEPSVKIETKDVPLTVLPSDAGIPDTPFSKDRNGHVKRPMAFMV    | 360 |
| Goat_SOX-30    | DLRIPLTLHTVPPGARIQFQGPPSELIRLTKVPLTPVPIKMQSLLEPSVKIETKDVPLTVLPSDAGIPDTPFSKDRNGHVKRPMAFMV    | 360 |
| Sheep_SOX-30   | DLRIPLTLHTVPPGARIQFQGPPSELIRLTKVPLTPVPIKMQSLLEPSVKIETKDVPLTVLPSDAGIPDTPFSKDRNGHVKRPMAFMV    | 360 |
|                |                                                                                             |     |
| Cow_SOX-30     | WARIHRPALAKANPAANNAEISVOLGLEWNKLSEEQKKPYDEAQKIKEKHREEFPGWVYQPRPGKRKRFPPLSVSVFSGTTQNIISTNP   | 450 |
| Buffalo_SOX-30 | WARIHRPALAKANPAANNAEISVOLGLEWNKLSEEQKKPYDEAQKIKEKHREEFPGWVYQPRPGKRKRFPPLSVSVFSGTTQNIISTNP   | 450 |
| Goat_SOX-30    | WARIHRPALAKANPAANNAEISVOLGLEWNKLSEEQKKPYDEAQKIKEKHREEFPGWVYQPRPGKRKRFPPLSVSVFSGTTQNIISTNP   | 450 |
| Sheep_SOX-30   | WARIHRPALAKANPAANNAEISVOLGLEWNKLSEEQKKPYDEAQKIKEKHREEFPGWVYQPRPGKRKRFPPLSVSVFSGTTQNIISTNP   | 450 |
|                |                                                                                             |     |
| Cow_SOX-30     | -TIYPYRSPTYSVVIPSLONAITHPVGESPTIQLPTPAVQRPSITLFPQSVSSTAQVAVQAPSLPLRPALPPQRFAGPSQADTHQLHS    | 539 |
| Buffalo_SOX-30 | -TIYPYRSPTYSVVIPSLONAITHPVGESPTIQLPTPAVQRPSITLFPQSVSSTAQVAVQAPSLPLRPALPPQRFAGPSQADTHQLHS    | 539 |
| Goat_SOX-30    | TIYPYRSPTYSVVIPSLONTITHPVGESPTIQLPTPAVQRPSITLFPQSVSSTAQVAVQAPSLPLRPALPPQRFAGPSQADTHQLHS     | 540 |
| Sheep_SOX-30   | TIYPYRSPTYSVVIPSLONTITHPVGESPTIQLPTPAVQRPSITLFPQSVSSTAQVAVQAPSLPLRPALPPQRFAGPSQADTHQLHS     | 540 |
|                |                                                                                             |     |
| Cow_SOX-30     | GVNRSVKRPTPVSLSTNRIPTSASPAHSRFATSTIQPKKEYPSVSTCPNSTPISQAPPPIPHSHIYQPSPLGHPAALFGTTPPRFSFHHPY | 629 |
| Buffalo_SOX-30 | GVNRSVKRPTPVSLSTNRIPTSASPAHSRFATSTIQPKKEYPSVSTCPNSTPISQAPPPIPHSHVFPPLGHPAALFGTTPPRFSFHHPY   | 629 |
| Goat_SOX-30    | GVNRSVKRPTPVSLSTNRIPTSASPAHSRFSTSTIQPKKEYPSVSTCPNSTPISQAPPPIPHSHVYQPSPLGHPAALFGTTPPRFSFHHPY | 630 |
| Sheep_SOX-30   | GVNRSVKRPTPVSLSTNRIPTSASPAHSRFSTSTIQPKKEYPSVSTCPNSTPISQAPPPIPHSHVYQPSPLGHPAALFGTTPPRFSFHHPY | 630 |
|                |                                                                                             |     |
| Cow_SOX-30     | FLPGPHYFPSSTCPYSRPPFGYGNFPSSMPECLGYIEDRYQKHEAMFSALNRDYPFRDYPDERAHNEDSRSCENMDGTSYYNSHCHSGEE  | 719 |
| Buffalo_SOX-30 | FLPGPHYFPSSTCPYSRPPFGYGNFPSSMPECLGYIEDRYQKHEAMFSALNRDYPFRDYPDERAHNEDSRSCENMDGTSYYNSHCHSGEE  | 719 |
| Goat_SOX-30    | FLPGPHYFPSSTCPYSRPPFGYGNFPSSMPECLGYIEDRYQKHEAMFSALNRDYPFRDYPDERAHNEDSRSCENMDGTSYYNSHCHSGEE  | 720 |
| Sheep_SOX-30   | FLPGPHYFPSSTCPYSRPPFGYGNFPSSMPECLGYIEDRYQKHEAMFSALNRDYPFRDYPDERAHNEDSRSCENMDGTSYYNSHCHSGEE  | 720 |
|                |                                                                                             |     |
| Cow_SOX-30     | YLNPIQLDIGALENVFTAPTSTPSSIQQVNVTDSDDEEEEEKVLRNL                                             | 766 |
| Buffalo_SOX-30 | YLNPMQLDIGALENVFTAPTSTPSSIQQVNVTDSDDEEEEEKVLRNL                                             | 766 |
| Goat_SOX-30    | YLNPMQLDIGALENVFTAPTSTPSSIQQVNVTDSDDEEEEEKVLRNL                                             | 767 |
| Sheep_SOX-30   | YLNPMQLDIGALENVFTAPTSTPSSIQQVNVTDSDDEEEEEKVLRNL                                             | 767 |

|               |              |     |
|---------------|--------------|-----|
| Cow_SOX-1     | AGANGTVPLTHI | 369 |
| Buffalo_SOX-1 | AGANGTVPLTHI | 370 |
| Goat_SOX-1    | AGANGTVPLTHI | 372 |
| Sheep_SOX-1   | AGANGTVPLTHI | 371 |

**Figure S19.** Comparative amino acid analysis of Sox30 gene in cattle, buffalo, sheep, and goat

|             |                                                                                           |     |
|-------------|-------------------------------------------------------------------------------------------|-----|
| SRY_Cow     | -----MFRVLNDDVYSPAVVQQTTLAFRKDSSLCTDSHSANDQCERGEHVRESSQDHVKRPMNAFIVTSRERRRKVALENPRM       | 79  |
| SRY_Buffalo | -----MFRVLNDDVYSPAGVQHNLAFRKDSSSCTDSHSANDQCERGENVRESSQDHVKRPMNAFIVTSRERRRKVALENPRM        | 79  |
| SRY_Goat    | MNRTVQSYASAMFRVLKDDVYSPAVVQQTTFAFGKTSSLCTDNHSANDQCERGENVRESSQDHVKRPMNAFIVTSRERRRKVALENPKL | 90  |
| SRY_Sheep   | MNRTVQSYASAMFRVLKDDVYSPAVVQQTTFAFGKTSSLCTDNHSANDQCERGENVRESSQNHVKRPMNAFIVTSRERRRKVALENPKL | 90  |
| SRY_Cow     | FNSDISKQLGYEWKRLTDAEKRPFEEAQRLLAIHRDKYPGYKYRPRRAKRPQKSLPADSSILCNPMHVETLHPFTYRDGCAKTTYSQM  | 169 |
| SRY_Buffalo | FNSDISKQLGYEGKRLTDAEKRPFEEAQRLLSIHRDKYPGYKYRPRRAKRLQKSLPADSSILCNPMHVETLHPFTYRDGCAKTTYSQM  | 169 |
| SRY_Goat    | QNSEISKQLGYEWKRLTDAEKRPFEEAQRLLAIHRDKYPGYKYRPRRAKRPQKSLDADSBILCNQMDVETLHPFTYRDDCAKTTTHSQM | 180 |
| SRY_Sheep   | QNSEISKQLGYEWKRLTDAEKRPFEEAQRLLAIHRDKYPGYKYRPRRAKRPQKSLDADSSILCNQMDAETLHPFTYRDDCAKTTTHSQM | 180 |
| SRY_Cow     | ESQLRSQSIVIITNSLLQKEHHSSWTSLGHNKVTLATRISADFPCKNSLEPGLSCAYFQY                              | 229 |
| SRY_Buffalo | ESHLSRSQSIVIITNSLLQKEHHSSWTSLGHNKVTLATRISADFPFNKNSLEPGLSCAYFQY                            | 229 |
| SRY_Goat    | ESQLCRSQSLILTNSLLQKEHHSSWTLGHDRTVLDTRISADFPFYQNSLEPGLSCAYVQY                              | 240 |
| SRY_Sheep   | ESQLRSQSIVIITNSLLQKEHHSSWTLGHDRTVLTASRISADFPFYQNSLEPGLSCAYVQY                             | 240 |

**Figure S20.** Comparative amino acid analysis of Sry gene in cattle, buffalo, sheep, and goat

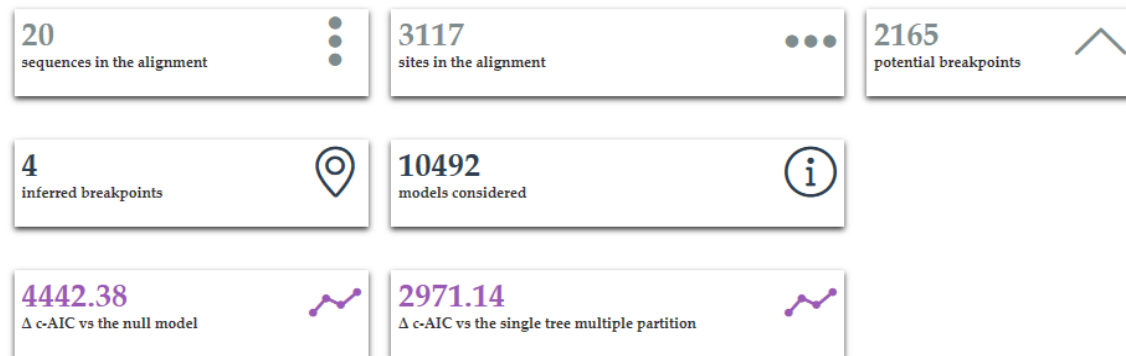

**Figure S21.** Analysis of GARD

**Table S1:** Buffalo and cattle Sox gene family with chromosome number and location

| Gene  | Buffalo    |                       | Cattle            |                      |
|-------|------------|-----------------------|-------------------|----------------------|
|       | Chromosome | Position              | Chromosome        | Position             |
| SOX1  | 13         | 1124390...1127795     | 12                | 86018990..86022110   |
| SOX2  | 1          | 130731784...130734338 | 1                 | 85302293..85303771   |
| SOX3  | X          | 118463501...118465239 | Unplaced Scaffold | 4426849..4429001     |
| SOX4  | 2          | 15869169...15873430   | 23                | 36517935..36522538   |
| SOX5  | 4          | 33262643...34419596   | 5                 | 85456814..86631212   |
| SOX6  | 16         | 48888897...49605774   | 15                | 35834420..36548505   |
| SOX7  | 3          | 71168529...71174671   | 8                 | 8558547..8565620     |
| SOX8  | 24         | 41398973...41403986   | 25                | 788544..793550       |
| SOX9  | 3          | 4493353...4498743     | 19                | 58918901..58922699   |
| SOX10 | 4          | 10196777...10207847   | 5                 | 109757715..109768623 |
| SOX11 | 12         | 90353529...90362307   | 11                | 90946223..90955282   |
| SOX12 | 14         | 22918829...22921779   | 13                | 60689766..60694687   |
| SOX13 | 5          | 79338823...79383069   | 16                | 1867662..1912526     |
| SOX14 | 1          | 176274075...176276138 | 1                 | 131371915..131372637 |
| SOX15 | 3          | 35785580...35787156   | 19                | 27319235..27321042   |
| SOX17 | 15         | 59969970...59975876   | 14                | 22229926..22231726   |
| SOX18 | 14         | 29832918...29834810   | 13                | 53823431..53825287   |
| SOX21 | 13         | 20645934...20650444   | 12                | 69200712..69204003   |
| SOX30 | 9          | 41564987...41608436   | 7                 | 69215442..69297855   |
| Sry   | Y          | 150...839             | Y                 | 42225210..42225899   |

**Table S2.** Functional effect of mutations in Sox genes in buffalo

|        | Mutation | Polyphen2         | Mupro    | Provean     | I-Mutant | Phd-Snp | SIFT          | SNAP <sup>2</sup> | Predict SNP | Meta SNP | SNAP    |                |
|--------|----------|-------------------|----------|-------------|----------|---------|---------------|-------------------|-------------|----------|---------|----------------|
| SOX-1  |          |                   |          |             |          |         |               |                   |             |          |         |                |
|        | A223P    | BENIGN            | DECREASE | Neutral     | Increase | Neutral | Tolerated     | Effect            | Neutral     | Neutral  | NA      | Synonymous     |
| SOX-4  |          |                   |          |             |          |         |               |                   |             |          |         |                |
|        | T225A    | UNKNOWN           | DECREASE | Neutral     | Decrease | Neutral | Tolerated     | Neutral           | Neutral     | Neutral  | NA      | Synonymous     |
| SOX-5  |          |                   |          |             |          |         |               |                   |             |          |         |                |
|        | A84T     | BENIGN            | DECREASE | Neutral     | Decrease | Neutral | Tolerated     | Neutral           | Neutral     | Neutral  | NA      | Synonymous     |
|        | P362S    | BENIGN            | DECREASE | Deleterious | Decrease | Neutral | Not Tolerated | Effect            | Neutral     | Neutral  | NA      | Non-Synonymous |
| SOX-6  |          |                   |          |             |          |         |               |                   |             |          |         |                |
|        | L2P      | UNKNOWN           | DECREASE | Neutral     | Decrease | Neutral | Not Tolerated | Neutral           | Neutral     | Neutral  | NA      | Non-Synonymous |
|        | E45D     | BENIGN            | INCREASE | Neutral     | Decrease | Neutral | Tolerated     | Effect            | Neutral     | Neutral  | NA      | Synonymous     |
|        | S66P     | BENIGN            | INCREASE | Neutral     | Increase | Neutral | Tolerated     | Effect            | Neutral     | Neutral  | NA      | Synonymous     |
|        | I138M    | BENIGN            | DECREASE | Neutral     | Decrease | Neutral | Tolerated     | Neutral           | Neutral     | Neutral  | NA      | Synonymous     |
|        | S476P    | BENIGN            | DECREASE | Neutral     | Increase | Neutral | Tolerated     | Neutral           | Neutral     | Neutral  | NA      | Synonymous     |
| SOX-7  |          |                   |          |             |          |         |               |                   |             |          |         |                |
|        | R168S    | BENIGN            | DECREASE | Neutral     | Decrease | Neutral | Tolerated     | Effect            | Neutral     | Neutral  | Neutral | Synonymous     |
|        | S264G    | BENIGN            | DECREASE | Neutral     | Decrease | Neutral | Tolerated     | Neutral           | Neutral     | Neutral  | Neutral | Synonymous     |
|        | P276S    | BENIGN            | DECREASE | Neutral     | Decrease | Neutral | Tolerated     | Effect            | Neutral     | Neutral  | Neutral | Synonymous     |
|        | A352G    | BENIGN            | DECREASE | Neutral     | Decrease | Neutral | Tolerated     | Neutral           | Neutral     | Neutral  | Neutral | Synonymous     |
| SOX-8  |          |                   |          |             |          |         |               |                   |             |          |         |                |
|        | R42H     | POSSIBLY DAMAGING | INCREASE | Neutral     | Decrease | Neutral | Not Tolerated | Effect            | Neutral     | Neutral  | NA      | Synonymous     |
|        | T43A     | BENIGN            | DECREASE | Neutral     | Decrease | Neutral | Not Tolerated | Effect            | Neutral     | Neutral  | NA      | Synonymous     |
|        | S270G    | BENIGN            | DECREASE | Neutral     | Decrease | Neutral | Tolerated     | Neutral           | Neutral     | Neutral  | NA      | Synonymous     |
|        | T382A    | BENIGN            | INCREASE | Neutral     | Decrease | Neutral | Tolerated     | Neutral           | Neutral     | Neutral  | NA      | Synonymous     |
|        | S391G    | PROBABLY DAMAGING | DECREASE | Neutral     | Decrease | Neutral | Tolerated     | Effect            | Neutral     | Neutral  | NA      | Synonymous     |
|        | Y443F    | BENIGN            | INCREASE | Neutral     | Decrease | Disease | Not Tolerated | Effect            | Deleterious | Neutral  | NA      | Non-Synonymous |
| SOX-9  |          |                   |          |             |          |         |               |                   |             |          |         |                |
|        | A372P    | UNKNOWN           | DECREASE | Neutral     | Increase | Neutral | Tolerated     | Effect            | Neutral     | Neutral  | NA      | Synonymous     |
|        | P374Q    | UNKNOWN           | DECREASE | Neutral     | Increase | Disease | Tolerated     | Neutral           | Neutral     | Neutral  | NA      | Synonymous     |
| SOX-11 |          |                   |          |             |          |         |               |                   |             |          |         |                |
|        | G351S    | UNKNOWN           | DECREASE | Neutral     | Increase | Neutral | Tolerated     | Neutral           | Neutral     | Neutral  | NA      | Synonymous     |
| SOX-13 |          |                   |          |             |          |         |               |                   |             |          |         |                |

|               |              |                   |          |         |           |         |               |         |             |         |         |                |
|---------------|--------------|-------------------|----------|---------|-----------|---------|---------------|---------|-------------|---------|---------|----------------|
|               | <b>G5R</b>   | UNKNOWN           | INCREASE | Neutral | Increase  | Neutral | Not Tolerated | Effect  | Deleterious | Neutral | Disease | Non-Synonymous |
|               | <b>F20V</b>  | UNKNOWN           | DECREASE | Neutral | Decrease  | Neutral | Not Tolerated | Effect  | Deleterious | Disease | Disease | Non-Synonymous |
|               | <b>F39L</b>  | UNKNOWN           | DECREASE | Neutral | Decrease  | Neutral | Not Tolerated | Effect  | Neutral     | Disease | Disease | Non-Synonymous |
|               | <b>T83A</b>  | BENIGN            | DECREASE | Neutral | Decrease  | Neutral | Tolerated     | Neutral | Neutral     | Neutral | Disease | Synonymous     |
|               | <b>T95I</b>  | BENIGN            | INCREASE | Neutral | Increase  | Neutral | Not Tolerated | Effect  | Neutral     | Neutral | Disease | Synonymous     |
|               | <b>T106A</b> | BENIGN            | INCREASE | Neutral | Decrease  | Neutral | Tolerated     | Neutral | Neutral     | Neutral | Neutral | Synonymous     |
|               | <b>S116L</b> | BENIGN            | INCREASE | Neutral | Decrease  | Neutral | Not Tolerated | Neutral | Neutral     | Neutral | Disease | Synonymous     |
|               | <b>G166D</b> | BENIGN            | DECREASE | Neutral | Decrease  | Neutral | Tolerated     | Neutral | Neutral     | Neutral | Neutral | Synonymous     |
|               | <b>A315T</b> | BENIGN            | DECREASE | Neutral | Decrease  | Neutral | Tolerated     | Neutral | Neutral     | Neutral | Neutral | Synonymous     |
|               | <b>G610S</b> | BENIGN            | DECREASE | Neutral | Decrease  | Neutral | Tolerated     | Neutral | Neutral     | Neutral | Neutral | Synonymous     |
|               | <b>V642M</b> | BENIGN            | DECREASE | Neutral | Decrease  | Neutral | Tolerated     | Effect  | Neutral     | Neutral | Neutral | Synonymous     |
| <b>SOX-15</b> |              |                   |          |         |           |         |               |         |             |         |         |                |
|               | <b>D15E</b>  | BENIGN            | DECREASE | Neutral | Increase  | Neutral | Tolerated     | Neutral | Neutral     | Neutral | Neutral | Synonymous     |
|               | <b>S124T</b> | BENIGN            | INCREASE | Neutral | Decrease  | Neutral | Tolerated     | Neutral | Neutral     | Neutral | Disease | Synonymous     |
|               | <b>T205P</b> | DAMAGING          | DECREASE | Neutral | Decrease  | Neutral | Not Tolerated | Effect  | Neutral     | Neutral | NA      | Non-Synonymous |
|               | <b>P211L</b> | BENIGN            | DECREASE | Neutral | Decrease  | Neutral | Tolerated     | Effect  | Neutral     | Neutral | Neutral | Synonymous     |
| <b>SOX-17</b> |              |                   |          |         |           |         |               |         |             |         |         |                |
|               | <b>A52G</b>  | BENIGN            | DECREASE | Neutral | Decrease  | Neutral | Tolerated     | Neutral | Neutral     | Neutral | Neutral | Synonymous     |
|               | <b>P374S</b> | UNKNOWN           | DECREASE | Neutral | Decrease  | Neutral | Tolerated     | Neutral | Neutral     | Neutral | Neutral | Synonymous     |
| <b>SOX-18</b> |              |                   |          |         |           |         |               |         |             |         |         |                |
|               | <b>A314V</b> | BENIGN            | DECREASE | Neutral | Increase  | Neutral | Tolerated     | Neutral | Neutral     | Neutral | NA      | Synonymous     |
|               | <b>S363T</b> | PROBABLY DAMAGING | INCREASE | Neutral | Increase  | Neutral | Tolerated     | Neutral | Neutral     | Neutral | NA      | Synonymous     |
| <b>SOX-21</b> |              |                   |          |         |           |         |               |         |             |         |         |                |
|               | <b>A119T</b> | BENIGN            | INCREASE | Neutral | Decreases | Neutral | Not Tolerated | Neutral | Neutral     | Neutral | NA      | Synonymous     |
| <b>SOX-30</b> |              |                   |          |         |           |         |               |         |             |         |         |                |
|               | <b>P21S</b>  | UNKNOWN           | DECREASE | Neutral | Decrease  | Neutral | Tolerated     | Neutral | Neutral     | Neutral | Neutral | Synonymous     |
|               | <b>P28A</b>  | UNKNOWN           | DECREASE | Neutral | Decrease  | Neutral | Not Tolerated | Effect  | Neutral     | Neutral | Neutral | Non-Synonymous |
|               | <b>A42V</b>  | POSSIBLY DAMAGING | INCREASE | Neutral | Increase  | Neutral | Not Tolerated | Neutral | Deleterious | Neutral | Neutral | Synonymous     |
|               | <b>C53W</b>  | PROBABLY DAMAGING | INCREASE | Neutral | Increase  | Neutral | Not Tolerated | Effect  | Deleterious | Disease | Disease | Non-Synonymous |
|               | <b>S103G</b> | BENIGN            | DECREASE | Neutral | Decrease  | Neutral | Not Tolerated | Neutral | Neutral     | Neutral | Neutral | Synonymous     |

|  |              |                      |          |             |          |         |                  |         |             |         |         |                    |
|--|--------------|----------------------|----------|-------------|----------|---------|------------------|---------|-------------|---------|---------|--------------------|
|  | <b>P118S</b> | PROBABLY<br>DAMAGING | DECREASE | Neutral     | Decrease | Neutral | Not<br>Tolerated | Neutral | Neutral     | Neutral | Neutral | Synonymous         |
|  | <b>T179R</b> | BENIGN               | DECREASE | Neutral     | Increase | Neutral | Not<br>Tolerated | Effect  | Deleterious | Neutral | Disease | Non-<br>Synonymous |
|  | <b>A230V</b> | BENIGN               | INCREASE | Neutral     | Decrease | Neutral | Not<br>Tolerated | Neutral | Neutral     | Neutral | Neutral | Synonymous         |
|  | <b>N253S</b> | BENIGN               | DECREASE | Neutral     | Decrease | Neutral | Tolerated        | Neutral | Neutral     | Neutral | Neutral | Synonymous         |
|  | <b>S542N</b> | BENIGN               | INCREASE | Neutral     | Increase | Neutral | Not<br>Tolerated | Neutral | Neutral     | Neutral | Disease | Synonymous         |
|  | <b>S555N</b> | BENIGN               | DECREASE | Neutral     | Decrease | Neutral | Not<br>Tolerated | Effect  | Neutral     | Neutral | Neutral | Synonymous         |
|  | <b>S590N</b> | BENIGN               | DECREASE | Neutral     | Decrease | Neutral | Not<br>Tolerated | Effect  | Neutral     | Neutral | Disease | Synonymous         |
|  | <b>I604V</b> | BENIGN               | DECREASE | Neutral     | Increase | Neutral | Tolerated        | Neutral | Neutral     | Neutral | Neutral | Synonymous         |
|  | <b>Y605F</b> | PROBABLY<br>DAMAGING | DECREASE | Neutral     | Increase | Neutral | Not<br>Tolerated | Effect  | Deleterious | Disease | Disease | Non-<br>Synonymous |
|  | <b>S608P</b> | BENIGN               | INCREASE | Neutral     | Increase | Neutral | Tolerated        | Neutral | Neutral     | Neutral | Neutral | Synonymous         |
|  | <b>E696D</b> | PROBABLY<br>DAMAGING | DECREASE | Neutral     | Decrease | Neutral | Not<br>Tolerated | Effect  | Deleterious | Neutral | Neutral | Non-<br>Synonymous |
|  | <b>I724M</b> | BENIGN               | DECREASE | Neutral     | Decrease | Neutral | Tolerated        | Neutral | Neutral     | Neutral | Neutral | Synonymous         |
|  | <b>SRY</b>   |                      |          |             |          |         |                  |         |             |         |         |                    |
|  | <b>V14G</b>  | BENIGN               | DECREASE | Neutral     | Decrease | Neutral | Tolerated        | Neutral | Neutral     | Neutral | NA      | Synonymous         |
|  | <b>Q17H</b>  | BENIGN               | DECREASE | Neutral     | Decrease | Neutral | Tolerated        | Effect  | Neutral     | Neutral | NA      | Synonymous         |
|  | <b>T19N</b>  | BENIGN               | INCREASE | Neutral     | Decrease | Neutral | Tolerated        | Neutral | Neutral     | Neutral | NA      | Synonymous         |
|  | <b>L29S</b>  | BENIGN               | DECREASE | Neutral     | Decrease | Neutral | Not<br>Tolerated | Effect  | Neutral     | Neutral | NA      | Synonymous         |
|  | <b>H45N</b>  | BENIGN               | INCREASE | Neutral     | Decrease | Neutral | Tolerated        | Neutral | Neutral     | Neutral | NA      | Synonymous         |
|  | <b>V54I</b>  | BENIGN               | DECREASE | Neutral     | Increase | Neutral | Tolerated        | Neutral | Neutral     | Neutral | NA      | Synonymous         |
|  | <b>V63L</b>  | BENIGN               | DECREASE | Deleterious | Decrease | Disease | Not<br>Tolerated | Effect  | Deleterious | Disease | NA      | Non-<br>Synonymous |
|  | <b>W64G</b>  | BENIGN               | DECREASE | Deleterious | Decrease | Disease | Not<br>Tolerated | Effect  | Deleterious | Disease | NA      | Non-<br>Synonymous |
|  | <b>R68Q</b>  | BENIGN               | DECREASE | Neutral     | Decrease | Neutral | Tolerated        | Neutral | Neutral     | Neutral | NA      | Synonymous         |
|  | <b>R69K</b>  | BENIGN               | DECREASE | Deleterious | Decrease | Disease | Not<br>Tolerated | Effect  | Deleterious | Disease | NA      | Non-<br>Synonymous |
|  | <b>R70Q</b>  | BENIGN               | DECREASE | Deleterious | Decrease | Disease | Not<br>Tolerated | Effect  | Deleterious | Disease | NA      | Non-<br>Synonymous |
|  | <b>V72L</b>  | BENIGN               | INCREASE | Neutral     | Increase | Neutral | Not<br>Tolerated | Neutral | Neutral     | Neutral | NA      | Synonymous         |
|  | <b>D83K</b>  | BENIGN               | DECREASE | Neutral     | Decrease | Disease | Not<br>Tolerated | Effect  | Deleterious | Disease | NA      | Non-<br>Synonymous |

|  |              |        |          |             |          |         |               |         |             |         |    |                |
|--|--------------|--------|----------|-------------|----------|---------|---------------|---------|-------------|---------|----|----------------|
|  | <b>W92G</b>  | BENIGN | DECREASE | Deleterious | Decrease | Disease | Not Tolerated | Effect  | Deleterious | Disease | NA | Non-Synonymous |
|  | <b>A112S</b> | BENIGN | DECREASE | Neutral     | Decrease | Disease | Not Tolerated | Effect  | Neutral     | Disease | NA | Non-Synonymous |
|  | <b>R128K</b> | BENIGN | DECREASE | Neutral     | Decrease | Neutral | Tolerated     | Neutral | Neutral     | Neutral | NA | Synonymous     |
|  | <b>P132L</b> | BENIGN | INCREASE | Neutral     | Decrease | Neutral | Tolerated     | Neutral | Neutral     | Neutral | NA | Synonymous     |
|  | <b>Q172H</b> | BENIGN | DECREASE | Deleterious | Decrease | Disease | Not Tolerated | Effect  | Neutral     | Neutral | NA | Non-Synonymous |
|  | <b>K201R</b> | BENIGN | DECREASE | Neutral     | Increase | Neutral | Tolerated     | Effect  | Neutral     | Neutral | NA | Synonymous     |
|  | <b>A210E</b> | BENIGN | DECREASE | Neutral     | Decrease | Neutral | Not Tolerated | Effect  | Neutral     | Neutral | NA | Synonymous     |
|  | <b>C214F</b> | BENIGN | DECREASE | Neutral     | Increase | Neutral | Tolerated     | Effect  | Neutral     | Neutral | NA | Synonymous     |
